# Supplementary material for: Reversible CO2 activation by a N-phosphinoamidinato digermyne
Source: Royal Society of Chemistry journal article supplement (doi:10.1039/d1cc05391d), 2021-12-17
Supplement: d1cc05391d1.pdf [file d1cc05391d1.pdf]

# Reversible CO<sub>2</sub> Activation by a *N*-Phosphinoamidinato Digermynes

Jun Fan,<sup>[a]</sup> Shina Quek,<sup>[a]</sup> Ming-Chung Yang,<sup>[b]</sup> Zheng-Feng Zhang,<sup>[b]</sup> Ming-Der Su,<sup>\*[b,c]</sup> and Cheuk-Wai So<sup>\*[a]</sup>

[a] Division of Chemistry and Biological Chemistry, School of Physical and Mathematical Sciences, Nanyang Technological University, Singapore 637371. [b] Department of Applied Chemistry, National Chiayi University, Chiayi 60004, Taiwan. [c] Department of Medicinal and Applied Chemistry, Kaohsiung Medical University, Kaohsiung 80708, Taiwan.

## Supporting Information

### Table of Contents

- S1. Experimental Procedure
- S2. Selected NMR Spectra
- S3. IR Spectra
- S4. VT-NMR studies for **5**
- S5. Reversible Activation of Carbon Dioxide
- S6. X-ray Data Collection and Structural Refinement
- S7. Theoretical Studies
- S8. References

---

## S1. Experimental Procedure

**General procedure.** All operations were carried out under an inert atmosphere of argon gas by standard Schlenk techniques. Chemicals were purchased from Sigma-Aldrich and used directly without further purification. *N*-phosphinoamidine was prepared according to literature.<sup>1</sup> All solvents were dried over K metal or CaH<sub>2</sub> prior to use. The <sup>1</sup>H, <sup>13</sup>C{<sup>1</sup>H}, <sup>19</sup>F{<sup>1</sup>H} and <sup>31</sup>P{<sup>1</sup>H} NMR spectra were recorded on a JEOL ECA 400 or Bruker Avance III 400 (BBFO 400) spectrometer. The NMR spectra were recorded in deuterated solvents and the chemical shifts are relative to SiMe<sub>4</sub> for <sup>1</sup>H and <sup>13</sup>C; BF<sub>3</sub>·Et<sub>2</sub>O for <sup>19</sup>F, 85% H<sub>3</sub>PO<sub>4</sub> for <sup>31</sup>P, respectively. The solid-state <sup>31</sup>P NMR experiment was completed on a 14.1 T Bruker Avance III HD 600 MHz spectrometer. The spectrum was processed using the Topspin software package and referenced to the unified scale using IUPAC recommended frequency ratios relative to the <sup>13</sup>C adamantane<sub>(s)</sub> methylene resonance ( $\delta = 37.77$  ppm).<sup>2,3</sup> The <sup>31</sup>P NMR decoupled one-pulse experiment was acquired using a 4 mm Bruker HXY probe at an MAS frequency of 14 kHz, utilising a  $\pi/2$  pulse of 3.8  $\mu$ s (determined on (NH<sub>4</sub>)H<sub>2</sub>PO<sub>4(s)</sub>), high power proton decoupling and a recycle delay of 30 s (determined via a saturation recovery measurement). IR spectra were recorded on Bruker Apex FTIR spectrometer in solution IR cells fitted with KBr windows and a 0.1 mm pathlength, at 2 cm<sup>-1</sup> resolution. HRMS spectra were obtained at the Mass Spectrometry Laboratory in the Division of Chemistry and Biological Chemistry, Nanyang Technological University. Melting points were measured with an OptiMelt Automated Melting Point System.

**Synthesis of 2 and 3:** A hexane solution of *n*BuLi (2.6 M, 0.4 mL, 1.05 mmol) was slowly added into a 100 mL Schlenk flask containing a stirring diethyl ether solution (40 mL) of *N*-phosphinoamidine (Ph: 0.34 g, 1 mmol, Dipp: 0.47 g, 1 mmol) at -78 °C. The solution was warmed to room temperature and stirred for 3 h. The resulting yellow solution was dried under vacuum to remove all volatiles to get the lithiated derivative. 40 mL of toluene was then added to the reaction flask containing the lithiated derivative and GeCl<sub>2</sub>.dioxane (0.232 g, 1 mmol) at -78 °C. The reaction mixture was allowed to warm to room temperature and stirred for 6 hours. The reaction mixture was filtered to remove LiCl and the filtrate was concentrated to obtain colorless crystals of **2** and **3**, respectively. Yield: **2**: 0.398 g (75%); **3**: 0.326 g (73%).

**2: M.p.:** 181 °C. <sup>1</sup>H NMR (C<sub>6</sub>D<sub>6</sub>, 400 MHz, 25 °C):  $\delta$  7.72-7.69 (m, 2 H, Ar-*H*), 7.11-7.04 (m, 3 H, Ar-*H*), 6.89-6.87 (m, 3 H, Ar-*H*), 3.49 (sep, 1 H, CHMe<sub>2</sub>,  $J_{\text{HH}} = 8$  Hz), 3.38 (sep, 1 H, CHMe<sub>2</sub>,  $J_{\text{HH}} = 8$  Hz), 1.52-1.46 (overlapping signals, 12 H, C(CH<sub>3</sub>)<sub>3</sub> and CH(CH<sub>3</sub>)<sub>2</sub>), 1.40 (d, 3 H, CH(CH<sub>3</sub>)<sub>2</sub>,  $J_{\text{HH}} = 8$  Hz), 1.26 (d, 3 H, CH(CH<sub>3</sub>)<sub>2</sub>,  $J_{\text{HH}} = 8$  Hz), 1.15 (d, 9 H, C(CH<sub>3</sub>)<sub>3</sub>,  $J_{\text{PH}} = 16$  Hz), 0.50 (d, 3 H, CH(CH<sub>3</sub>)<sub>2</sub>,  $J_{\text{HH}} = 8$  Hz). <sup>13</sup>C{<sup>1</sup>H}

(**C<sub>6</sub>D<sub>6</sub>**, **101 MHz**, **25 °C**):  $\delta$  174.3 (NCN), 146.4 (C-Ar), 144.3 (C-Ar), 139.1 (C-Ar), 136.8 (C-Ar), 130.6 (C-Ar), 129.8 (C-Ar), 127.5 (C-Ar), 127.4 (C-Ar), 125.6 (C-Ar), 124.3 (C-Ar), 40.5 (d, C(CH<sub>3</sub>)<sub>3</sub>,  $J_{PC}$  = 11 Hz), 36.2 (d, C(CH<sub>3</sub>)<sub>3</sub>,  $J_{PC}$  = 26 Hz), 29.5 (CH(CH<sub>3</sub>)<sub>2</sub>), 28.4 (CH(CH<sub>3</sub>)<sub>2</sub>), 28.1 (C(CH<sub>3</sub>)<sub>3</sub>), 27.6 (C(CH<sub>3</sub>)<sub>3</sub>), 26.4 (CH(CH<sub>3</sub>)<sub>2</sub>), 26.1 (CH(CH<sub>3</sub>)<sub>2</sub>), 24.5 (CH(CH<sub>3</sub>)<sub>2</sub>), 24.0 (CH(CH<sub>3</sub>)<sub>2</sub>). **<sup>31</sup>P{<sup>1</sup>H}** (**C<sub>6</sub>D<sub>6</sub>**, **162 MHz**, **25 °C**):  $\delta$  77.3. HRMS (ESI):  $m/z$  calcd for C<sub>27</sub>H<sub>41</sub><sup>74</sup>GeN<sub>2</sub>PCl: 533.1908 [(*M* + *H*)]<sup>+</sup>; found: 533.1907.

**3**: **M.p.**: 113 °C. **<sup>1</sup>H NMR** (**C<sub>6</sub>D<sub>6</sub>**, **400 MHz**, **25 °C**):  $\delta$  7.51-7.49 (m, 2 H, Ar-*H*), 7.18-7.12 (m, 2 H, Ar-*H*), 6.93-6.86 (m, 5 H, Ar-*H*), 6.78-6.74 (m, 1 H, Ar-*H*), 1.42 (d, 9 H, C(CH<sub>3</sub>)<sub>3</sub>,  $J_{PH}$  = 16 Hz), 1.12 (d, 9 H, C(CH<sub>3</sub>)<sub>3</sub>,  $J_{PH}$  = 16 Hz). **<sup>13</sup>C{<sup>1</sup>H}** (**C<sub>6</sub>D<sub>6</sub>**, **101 MHz**, **25 °C**):  $\delta$  176.1 (NCN), 145.5 (C-Ar), 137.1 (C-Ar), 129.9 (C-Ar), 129.3 (C-Ar), 129.0 (C-Ar), 127.7 (C-Ar), 127.5 (C-Ar), 124.9 (C-Ar), 39.3 (d, C(CH<sub>3</sub>)<sub>3</sub>,  $J_{PC}$  = 13 Hz), 37.4 (d, C(CH<sub>3</sub>)<sub>3</sub>,  $J_{PC}$  = 13 Hz), 28.3 (C(CH<sub>3</sub>)<sub>3</sub>), 27.3 (C(CH<sub>3</sub>)<sub>3</sub>). **<sup>31</sup>P{<sup>1</sup>H}** (**C<sub>6</sub>D<sub>6</sub>**, **162 MHz**, **25 °C**):  $\delta$  80.5. HRMS (ESI):  $m/z$  calcd for C<sub>21</sub>H<sub>28</sub><sup>74</sup>GeN<sub>2</sub>PClNa: 471.0788 [(*M* + *Na*)]<sup>+</sup>; found: 471.0787.

**Synthesis of 4 and 5**: 60 mL of toluene was added to a 100 mL Schlenk flask containing the chlorogermylene (**2**: 0.532 g, 1 mmol; **3**: 0.448 g, 1 mmol) and excess potassium graphite (0.311 g, 2.3 mmol). Upon addition of toluene, a red suspension was observed, and the reaction mixture was stirred for 6 hours at room temperature. The reaction mixture was then filtered to give a red solution. All volatiles were removed under vacuum and gave compounds **4** and **5** as a red solid. Dark red crystals of **4** were obtained from a saturated hexane solution. Dark orange crystals of **5** were obtained from a saturated toluene solution. Yield: **4**: 0.238g (48%); **5**: 0.247 g (60%).

**4**: **M.p.**: 193 °C. **<sup>1</sup>H NMR** (**C<sub>6</sub>D<sub>6</sub>**, **400 MHz**, **25 °C**):  $\delta$  7.61 (d, 4 H, Ar*H*,  $J_{HH}$  = 8 Hz), 7.06-7.00 (m, 4 H, Ar*H*), 6.93-6.86 (m, 8 H, Ar*H*), 4.19 (sep, 2 H, CHMe<sub>2</sub>,  $J_{HH}$  = 8 Hz), 3.34 (sep, 2 H, CHMe<sub>2</sub>,  $J_{HH}$  = 8 Hz), 1.52 (d, 6 H, CH(CH<sub>3</sub>)<sub>2</sub>,  $J_{HH}$  = 8 Hz), 1.38 (d, 6 H, CH(CH<sub>3</sub>)<sub>2</sub>,  $J_{HH}$  = 8 Hz), 1.32-1.20 (overlapping signals, 42 H, CH(CH<sub>3</sub>)<sub>2</sub> and C(CH<sub>3</sub>)<sub>3</sub>), 0.49 (d, 6 H, CH(CH<sub>3</sub>)<sub>2</sub>,  $J_{HH}$  = 8 Hz). **<sup>13</sup>C{<sup>1</sup>H}** (**C<sub>6</sub>D<sub>6</sub>**, **101 MHz**, **25 °C**):  $\delta$  169.2 (NCN), 144.6 (C-Ar), 144.5 (C-Ar), 143.8 (C-Ar), 137.8 (C-Ar), 131.0 (C-Ar), 128.5 (C-Ar), 127.2 (C-Ar), 126.6 (C-Ar), 125.5 (C-Ar), 124.6 (C-Ar), 40.2 (C(CH<sub>3</sub>)<sub>3</sub>), 37.1 (C(CH<sub>3</sub>)<sub>3</sub>), 29.9 C(CH<sub>3</sub>)<sub>3</sub>, 29.1-28.6 (overlapping signals, CH(CH<sub>3</sub>)<sub>2</sub>, C(CH<sub>3</sub>)<sub>3</sub>), 26.8 (CH(CH<sub>3</sub>)<sub>2</sub>), 25.1 (CH(CH<sub>3</sub>)<sub>2</sub>), 23.4 (CH(CH<sub>3</sub>)<sub>2</sub>). **<sup>31</sup>P{<sup>1</sup>H}** (**C<sub>6</sub>D<sub>6</sub>**, **162 MHz**, **25 °C**):  $\delta$  100.9. HRMS (ESI):  $m/z$  calcd for C<sub>54</sub>H<sub>81</sub><sup>73</sup>Ge<sub>2</sub>N<sub>4</sub>P<sub>2</sub>: 993.4406 [(*M* + *H*)]<sup>+</sup>; found: 993.4391.

**5**: **M.p.**: 144 °C. **<sup>1</sup>H NMR** (**C<sub>6</sub>D<sub>6</sub>**, **400 MHz**, **25 °C**):  $\delta$  7.81-7.78 (m, 2 H, Ar-*H*), 7.51 (d, 2 H, Ar-*H*,  $J_{HH}$  = 4 Hz), 7.28 (d, 2 H, Ar-*H*,  $J_{HH}$  = 8 Hz), 7.12 (d, 2 H, Ar-*H*,  $J_{HH}$  = 8 Hz), 6.96-6.86 (m, 10 H, Ar-*H*), 6.70 (q, 2 H, Ar-*H*,  $J_{HH}$  = 8 Hz), 1.46 (d, 9 H, C(CH<sub>3</sub>)<sub>3</sub>,  $J_{PH}$  = 12 Hz), 1.43 (d, 9 H, C(CH<sub>3</sub>)<sub>3</sub>,  $J_{PH}$  = 12 Hz), 1.34 (d, 9 H, C(CH<sub>3</sub>)<sub>3</sub>,  $J_{PH}$  = 8 Hz),

1.30 (d, 9 H, C(CH<sub>3</sub>)<sub>3</sub>,  $J_{\text{PH}} = 8$  Hz). <sup>13</sup>C{<sup>1</sup>H} (C<sub>6</sub>D<sub>6</sub>, 101 MHz, 25 °C): δ 171.7 (NCN), 171.0 (NCN), 147.8 (C-Ar), 147.5 (C-Ar), 138.3 (C-Ar), 137.5 (C-Ar), 130.7 (C-Ar), 129.9 (C-Ar), 128.9 (C-Ar), 128.8 (C-Ar), 128.7 (C-Ar), 128.6 (C-Ar), 127.6 (C-Ar), 127.5 (C-Ar), 127.4 (C-Ar), 124.5 (C-Ar), 124.0 (C-Ar), 40.0 (C(CH<sub>3</sub>)<sub>3</sub>), 39.8 (C(CH<sub>3</sub>)<sub>3</sub>), 37.6 (C(CH<sub>3</sub>)<sub>3</sub>), 37.4 (C(CH<sub>3</sub>)<sub>3</sub>), 29.5 (C(CH<sub>3</sub>)<sub>3</sub>), 29.1 (C(CH<sub>3</sub>)<sub>3</sub>), 27.7 (C(CH<sub>3</sub>)<sub>3</sub>), 27.6 (C(CH<sub>3</sub>)<sub>3</sub>). <sup>31</sup>P{<sup>1</sup>H} (C<sub>6</sub>D<sub>6</sub>, 162 MHz, 25 °C): δ 99.3, 99.1. HRMS (ESI):  $m/z$  calcd for C<sub>42</sub>H<sub>57</sub><sup>73</sup>Ge<sub>2</sub>N<sub>4</sub>P<sub>2</sub>: 825.2528 [(*M* + *H*)<sup>+</sup>]; found: 825.2509.

**Synthesis of 6:** 40 mL of toluene was added to a 100 mL Schlenk flask containing **4** (0.496 g, 0.5 mmol). The reaction mixture was degassed using a freeze–pump–thaw method. CO<sub>2</sub> (1 bar) was introduced. The dark red reaction mixture was stirred at room temperature for 4 hours to give an orange solution. The solution was filtered and concentrated to afford **6** as orange crystals. Yield: 0.316 g (61%).

**M.p.:** 138 °C. <sup>1</sup>H NMR (C<sub>6</sub>D<sub>6</sub>, 400 MHz, 25 °C): δ 7.80-7.75 (m, 4 H, ArH), 7.09-7.05 (m, 3 H, ArH), 6.96-6.86 (m, 9 H, ArH), 3.87 (sep, 1 H, CHMe<sub>2</sub>,  $J_{\text{HH}} = 8$  Hz), 3.74 (sep, 1 H, CHMe<sub>2</sub>,  $J_{\text{HH}} = 8$  Hz), 3.53 (sep, 1 H, CHMe<sub>2</sub>,  $J_{\text{HH}} = 8$  Hz), 3.27 (sep, 1 H, CHMe<sub>2</sub>,  $J_{\text{HH}} = 8$  Hz), 1.67 (d, 3 H, CH(CH<sub>3</sub>)<sub>2</sub>,  $J_{\text{HH}} = 8$  Hz), 1.62 (d, 3 H, CH(CH<sub>3</sub>)<sub>2</sub>,  $J_{\text{HH}} = 8$  Hz), 1.59 (d, 3 H, CH(CH<sub>3</sub>)<sub>2</sub>,  $J_{\text{HH}} = 8$  Hz), 1.45 (d,  $J = 4$  Hz, 3H, CH(CH<sub>3</sub>)<sub>2</sub>), 1.36 (d, 3 H, CH(CH<sub>3</sub>)<sub>2</sub>,  $J_{\text{HH}} = 8$  Hz), 1.33 (d, 3 H, CH(CH<sub>3</sub>)<sub>2</sub>,  $J_{\text{HH}} = 8$  Hz), 1.31-1.25 (overlapping signals, 36 H, C(CH<sub>3</sub>)<sub>3</sub>), 0.53 (d, 3 H, CH(CH<sub>3</sub>)<sub>2</sub>,  $J_{\text{HH}} = 8$  Hz), 0.49 (d, 3 H, CH(CH<sub>3</sub>)<sub>2</sub>,  $J_{\text{HH}} = 8$  Hz). <sup>13</sup>C{<sup>1</sup>H} (C<sub>6</sub>D<sub>6</sub>, 101 MHz, 25 °C): δ 206.6 (OCO), 173.5 (NCN), 171.7 (NCN), 146.7 (C-Ar), 145.6 (C-Ar), 144.1 (C-Ar), 143.8 (C-Ar), 140.6 (C-Ar), 137.6 (C-Ar), 130.7 (C-Ar), 130.5 (C-Ar), 129.4 (C-Ar), 129.3 (C-Ar), 128.6 (C-Ar), 127.4 (C-Ar), 126.4 (C-Ar), 126.2 (C-Ar), 125.7 (C-Ar), 125.3 (C-Ar), 124.8 (C-Ar), 124.1 (C-Ar), 40.1 (d, C(CH<sub>3</sub>)<sub>3</sub>,  $J_{\text{PC}} = 9$  Hz), 39.9 (d, C(CH<sub>3</sub>)<sub>3</sub>,  $J_{\text{PC}} = 11$  Hz), 36.0 (d, C(CH<sub>3</sub>)<sub>3</sub>,  $J_{\text{PC}} = 13$  Hz), 35.7 (d, C(CH<sub>3</sub>)<sub>3</sub>,  $J_{\text{PC}} = 7$  Hz), 29.5 (C(CH<sub>3</sub>)<sub>3</sub>), 28.8 (CH(CH<sub>3</sub>)<sub>2</sub>), 28.3 (CH(CH<sub>3</sub>)<sub>2</sub>), 28.1 (CH(CH<sub>3</sub>)<sub>2</sub>), 27.9 (CH(CH<sub>3</sub>)<sub>2</sub>), 27.7 (C(CH<sub>3</sub>)<sub>3</sub>), 27.3 (C(CH<sub>3</sub>)<sub>3</sub>), 26.9 (C(CH<sub>3</sub>)<sub>3</sub>), 26.2 (CH(CH<sub>3</sub>)<sub>2</sub>), 25.7 (CH(CH<sub>3</sub>)<sub>2</sub>), 24.8 (CH(CH<sub>3</sub>)<sub>2</sub>), 24.7 (CH(CH<sub>3</sub>)<sub>2</sub>), 23.8 (CH(CH<sub>3</sub>)<sub>2</sub>). <sup>31</sup>P{<sup>1</sup>H} (C<sub>6</sub>D<sub>6</sub>, 162 MHz, 25 °C): δ 82.9, 73.4. IR (benzene, KBr)  $\nu$  (cm<sup>-1</sup>): 1581 (C=O), 1261 (C-O). HRMS (ESI):  $m/z$  calcd for C<sub>55</sub>H<sub>81</sub><sup>73</sup>Ge<sub>2</sub>N<sub>4</sub>P<sub>2</sub>O<sub>2</sub>: 1037.4304 [(*M* + *H*)<sup>+</sup>]; found: 1037.4287.

**Synthesis of 7:** **5** (0.082 g, 0.1 mmol) and deuterated benzene (0.4 mL) were placed into a J-Young NMR tube. The solution was degassed using a freeze–pump–thaw method. Carbon dioxide (1 bar) was introduced and the color of the solution changed immediately from red to pale orange. The <sup>1</sup>H and <sup>31</sup>P{<sup>1</sup>H} NMR spectroscopy showed that compound **5** was fully converted to compound **7**. Leaving compound **7** to stand for a few hours revealed the presence of a second set of signals. <sup>13</sup>C{<sup>1</sup>H} NMR spectroscopy confirmed the presence of 2 conformers of compound **7**. CO<sub>2</sub> were removed under reduced pressure. The solution changed immediately from pale orange

to red. The  $^{31}\text{P}\{^1\text{H}\}$  NMR spectroscopy showed that compound **7** was fully converted to compound **5**.

**$^1\text{H}$  NMR ( $\text{C}_6\text{D}_6$ , 400 MHz, 25 °C):**  $\delta$  7.66-7.61 (m, 3 H, ArH), 7.43-7.41(m, 2 H, ArH), 7.31-7.23 (m, 3 H, ArH), 6.97-6.87 (m, 10 H, ArH), 6.78-6.67 (m, 2 H, ArH), 1.45 (d, 9 H, C(CH<sub>3</sub>)<sub>3</sub>,  $J_{\text{HH}} = 14$  Hz), 1.33 (d, 9 H, C(CH<sub>3</sub>)<sub>3</sub>,  $J_{\text{HH}} = 8$  Hz), 1.29 (d, 9 H, C(CH<sub>3</sub>)<sub>3</sub>,  $J_{\text{HH}} = 8$  Hz), 1.23 (d, 9 H, C(CH<sub>3</sub>)<sub>3</sub>,  $J_{\text{HH}} = 14$  Hz).  **$^{13}\text{C}\{^1\text{H}\}$  ( $\text{C}_6\text{D}_6$ , 101 MHz, 25 °C):**  $\delta$  209.2 (OCO), 207.6 (OCO), 175.3 (NCN), 175.1 (NCN), 174.9 (NCN), 174.2 (NCN), 147.5 (C-Ar), 147.4 (C-Ar), 147.3 (C-Ar), 147.2 (C-Ar), 147.1 (C-Ar), 147.0 (C-Ar), 146.7 (C-Ar), 146.6 (C-Ar), 138.2 (C-Ar), 138.0 (C-Ar), 138.0 (C-Ar), 137.9 (C-Ar), 137.7 (C-Ar), 130.3 (C-Ar), 130.2 (C-Ar), 130.0 (C-Ar), 129.0 (C-Ar), 128.7 (C-Ar), 128.6 (C-Ar), 128.5 (C-Ar), 128.2 (C-Ar), 127.9 (C-Ar), 127.9 (C-Ar), 127.7 (C-Ar), 127.6 (C-Ar), 126.8 (C-Ar), 124.8 (C-Ar), 124.4 (C-Ar), 124.0 (C-Ar), 124.0 (C-Ar), 123.9 (C-Ar), 121.8 (C-Ar), 39.3 (C(CH<sub>3</sub>)<sub>3</sub>), 38.8 (C(CH<sub>3</sub>)<sub>3</sub>), 38.7 (C(CH<sub>3</sub>)<sub>3</sub>), 38.3 (C(CH<sub>3</sub>)<sub>3</sub>), 37.1 (C(CH<sub>3</sub>)<sub>3</sub>), 36.9 (C(CH<sub>3</sub>)<sub>3</sub>), 36.9 (C(CH<sub>3</sub>)<sub>3</sub>), 36.7 (C(CH<sub>3</sub>)<sub>3</sub>), 28.4 (C(CH<sub>3</sub>)<sub>3</sub>), 28.1 (C(CH<sub>3</sub>)<sub>3</sub>), 27.9 (C(CH<sub>3</sub>)<sub>3</sub>), 27.8 (C(CH<sub>3</sub>)<sub>3</sub>), 27.7 (C(CH<sub>3</sub>)<sub>3</sub>), 27.4 (C(CH<sub>3</sub>)<sub>3</sub>).  **$^{31}\text{P}\{^1\text{H}\}$  ( $\text{C}_6\text{D}_6$ , 162 MHz, 25 °C):**  $\delta$  87.8, 77.8. IR (benzene, KBr)  $\nu$  (cm<sup>-1</sup>): 1593 (C=O), 1260 (C-O). HRMS (ESI):  $m/z$  calcd for C<sub>43</sub>H<sub>56</sub><sup>74</sup>Ge<sub>2</sub>N<sub>4</sub>P<sub>2</sub>O<sub>2</sub>Na: 893.2200 [(M + Na)]<sup>+</sup>; found: 893.2216.

**Synthesis of **8** from **7**:** 40 mL of toluene was added to a 100 mL Schlenk flask containing compound **5** (0.412 g, 0.5 mmol). The solution was degassed using a freeze-pump-thaw method. CO<sub>2</sub> (1 bar) was then introduced. The color of the reaction solution changed immediately from red to yellow. The  $^{31}\text{P}\{^1\text{H}\}$  NMR spectroscopy showed that compound **5** was fully converted to compound **7**. The diphenylacetylene (0.089 g, 0.5 mmol) was then added into the reaction and the mixture was stirred at 60 °C for 6 hours. The color of the solution changed from brown yellow to red to bright yellow. The reaction mixture was filtered and concentrated to give **8** as yellow crystals. Yield: 0.326 g (65%).

**Synthesis of **8** from **5**:** 40 mL of toluene was added to a 100 mL Schlenk flask containing **5** (0.412 g, 0.5 mmol) and diphenylacetylene (0.0891 g, 0.5 mmol). The reaction mixture was stirred for 3 days at room temperature to give a yellow solution. The reaction mixture was filtered and concentrated to give **8** as yellow crystals. Yield: 0.341 g (68%).

**M.p.:** 118 °C.  **$^1\text{H}$  NMR ( $\text{C}_6\text{D}_6$ , 400 MHz, 25 °C):**  $\delta$  7.70-7.68 (m, 4 H, ArH), 7.53-7.50 (m, 2 H, ArH), 7.41 (d, 4 H, ArH,  $J_{\text{HH}} = 8$  Hz), 7.00-6.89 (m, 10 H, ArH), 6.77-6.73 (m, 4 H, ArH), 6.65-6.61 (m, 2 H, ArH), 6.38-6.35 (m, 4 H, ArH), 1.75 (d, 18 H, C(CH<sub>3</sub>)<sub>3</sub>,  $J_{\text{HH}} = 12$  Hz), 1.44 (d, 18 H, C(CH<sub>3</sub>)<sub>3</sub>,  $J_{\text{HH}} = 12$  Hz).  **$^{13}\text{C}\{^1\text{H}\}$  ( $\text{C}_6\text{D}_6$ , 101 MHz, 25 °C):**  $\delta$  174.5 (NCN), 170.6 (C-Ar), 147.5 (C-Ar), 145.4 (C-Ar), 137.4 (C-Ar), 131.9 (C-Ar), 131.5 (C-Ar), 130.6 (C-Ar), 129.5 (C-Ar), 129.3 (C-Ar), 128.3 (C-Ar),

---

127.5 (C-Ar), 125.6 (C-Ar), 124.7 (C-Ar), 123.1 (C-Ar), 90.2 (PhC=CPh), 38.6 (d, C(CH<sub>3</sub>)<sub>3</sub>,  $J_{PC} = 20$  Hz), 37.8 (d, C(CH<sub>3</sub>)<sub>3</sub>,  $J_{PC} = 16$  Hz), 29.4 (C(CH<sub>3</sub>)<sub>3</sub>), 27.9 (C(CH<sub>3</sub>)<sub>3</sub>). <sup>31</sup>P{<sup>1</sup>H} (C<sub>6</sub>D<sub>6</sub>, 162 MHz, 25 °C): δ 80.9. HRMS (ESI):  $m/z$  calcd for C<sub>56</sub>H<sub>67</sub><sup>73</sup>Ge<sub>2</sub>N<sub>4</sub>P<sub>2</sub>: 1003.3310 [(*M* + *H*)<sup>+</sup>]; found: 1003.3298.

**Synthesis of 9 and 10 from 7:** 40 mL of toluene was added to a 100 mL Schlenk flask containing **5** (0.412 g, 0.5 mmol). The solution was degassed using a freeze–pump–thaw method. CO<sub>2</sub> (1 bar) was then introduced. The color of the reaction solution changed immediately from red to yellow. The <sup>31</sup>P{<sup>1</sup>H} NMR spectroscopy showed that compound **5** was fully converted to compound **7**. The hexafluorobenzene (0.372 g, 2 mmol) was then added into the reaction and the mixture was stirred at 80 °C for 4 hours. The color of the solution changed from brown yellow to red to brown. Volatiles were removed under reduced pressure to give a mixture of compounds **9** and **10** as a brown solid.

**Synthesis of 9 and 10 from 5:** 40 mL of toluene was added to a 100 mL Schlenk flask containing **5** (0.412 g, 0.5 mmol) and hexafluorobenzene (0.372 g, 2 mmol). The reaction mixture was stirred at 90 °C for 7 hours to give a brown solution. Volatiles were removed under reduced pressure to give a mixture of compounds **9** and **10** as a brown solid.

<sup>1</sup>H NMR (C<sub>6</sub>D<sub>6</sub>, 400 MHz, 25 °C): δ 7.62-7.60 (m, 2 H, ArH), 7.55-7.53 (m, 2 H, ArH), 7.28-7.22 (m, 1 H, ArH), 7.03-7.01 (m, 2 H, ArH), 6.93-6.88 (m, 11 H, ArH), 6.77-6.72 (m, 2 H, ArH), 1.35 (d, 9 H, C(CH<sub>3</sub>)<sub>3</sub>,  $J_{HH} = 16$  Hz), 1.21 (d, 9 H, C(CH<sub>3</sub>)<sub>3</sub>,  $J_{HH} = 12$  Hz), 1.14 (d, 9 H, C(CH<sub>3</sub>)<sub>3</sub>,  $J_{HH} = 16$  Hz), 0.98 (d, 18 H, C(CH<sub>3</sub>)<sub>3</sub>,  $J_{HH} = 12$  Hz). <sup>13</sup>C{<sup>1</sup>H} (C<sub>6</sub>D<sub>6</sub>, 101 MHz, 25 °C): δ 176.2 (NCN), 175.6 (NCN), 146.2 (C-Ar), 145.9 (C-Ar), 137.1 (C-Ar), 136.7 (C-Ar), 129.8 (C-Ar), 129.7 (C-Ar), 129.1 (C-Ar), 128.9 (C-Ar), 128.7 (C-Ar), 128.6 (C-Ar), 126.8 (C-Ar), 126.0 (C-Ar), 124.2 (C-Ar), 124.0 (C-Ar), 121.5 (C-Ar), 37.3 (d, C(CH<sub>3</sub>)<sub>3</sub>,  $J_{PC} = 24$  Hz), 36.1 (d, C(CH<sub>3</sub>)<sub>3</sub>,  $J_{PC} = 20$  Hz), 27.7 (C(CH<sub>3</sub>)<sub>3</sub>), 27.5 (C(CH<sub>3</sub>)<sub>3</sub>), 26.9 (C(CH<sub>3</sub>)<sub>3</sub>), 26.7 (C(CH<sub>3</sub>)<sub>3</sub>). <sup>19</sup>F{<sup>1</sup>H} NMR (376 MHz, 25 °C, C<sub>6</sub>D<sub>6</sub>), **9**: -148.1 (d, 1 F,  $J_{PF} = 7$  Hz); **10**: δ -127.4 (dd, 1 F,  $J_{FF} = 7$ , 7 Hz), -154.3 (dt, 2 F,  $J_{FF} = 22$ , 4 Hz), -161.2 (m, 2 F). <sup>31</sup>P{<sup>1</sup>H} (C<sub>6</sub>D<sub>6</sub>, 162 MHz, 25 °C), **9**: δ 76.7 (d,  $J_{PF} = 6$  Hz); **10**: δ 85.3. HRMS (ESI), **9**:  $m/z$  calcd for C<sub>21</sub>H<sub>29</sub><sup>74</sup>GeN<sub>2</sub>PF: 433.1264 [(*M* + *H*)<sup>+</sup>]; found: 433.1268; **10**:  $m/z$  calcd for C<sub>27</sub>H<sub>29</sub><sup>74</sup>GeN<sub>2</sub>PF<sub>5</sub>: 581.1200 [(*M* + *H*)<sup>+</sup>]; found: 581.1207.

## S2. Selected NMR Spectra

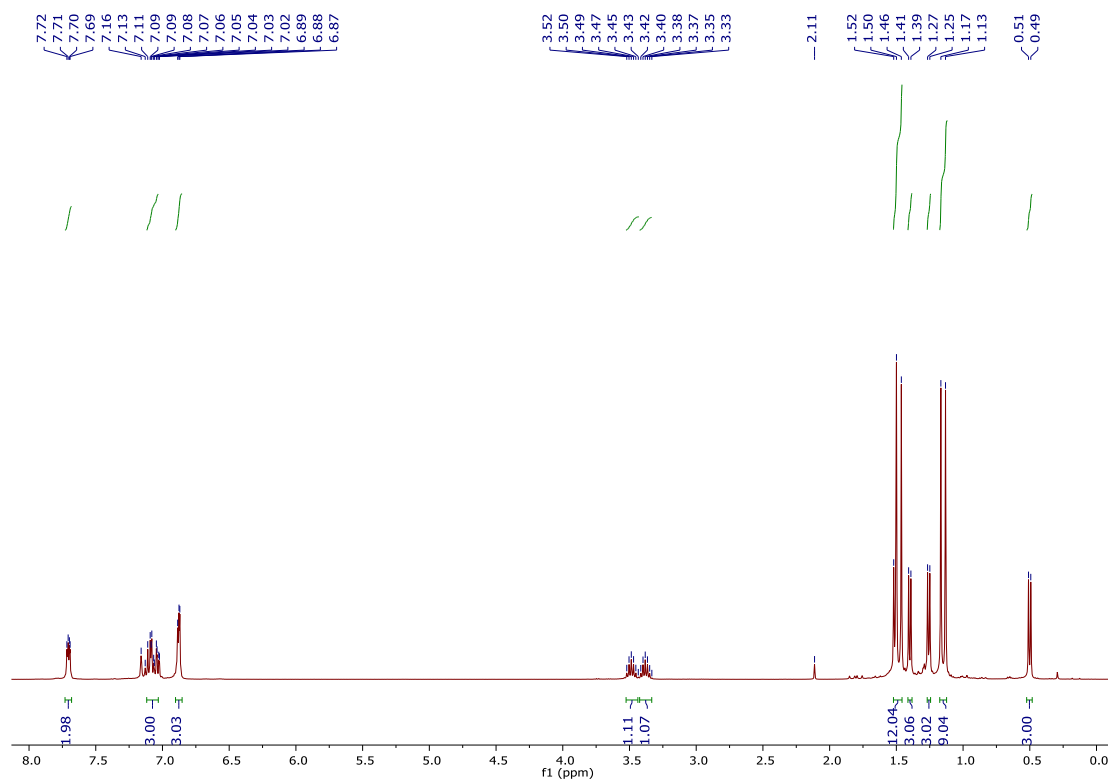

**Figure S1.**  $^1\text{H}$  NMR spectrum of compound **2** (in  $\text{C}_6\text{D}_6$ ).

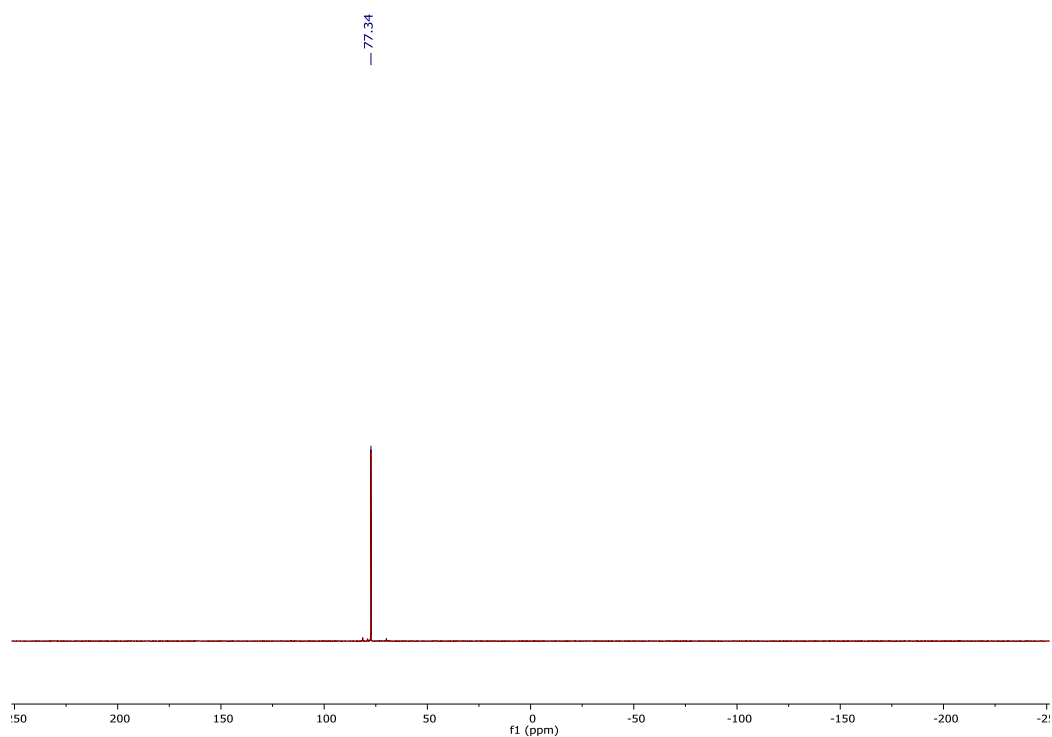

**Figure S2.**  $^{31}\text{P}\{^1\text{H}\}$  NMR spectrum of compound **2** (in  $\text{C}_6\text{D}_6$ ).

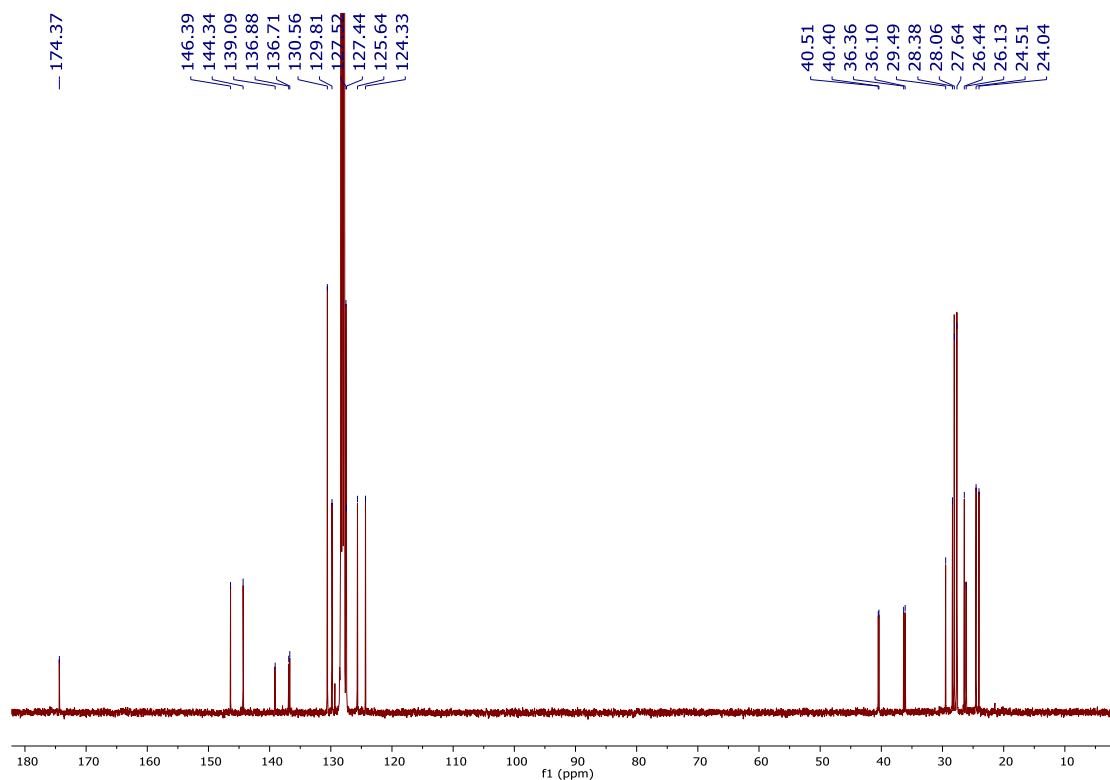

**Figure S3.**  $^{13}\text{C}\{^1\text{H}\}$  NMR spectrum of compound **2** (in  $\text{C}_6\text{D}_6$ ).

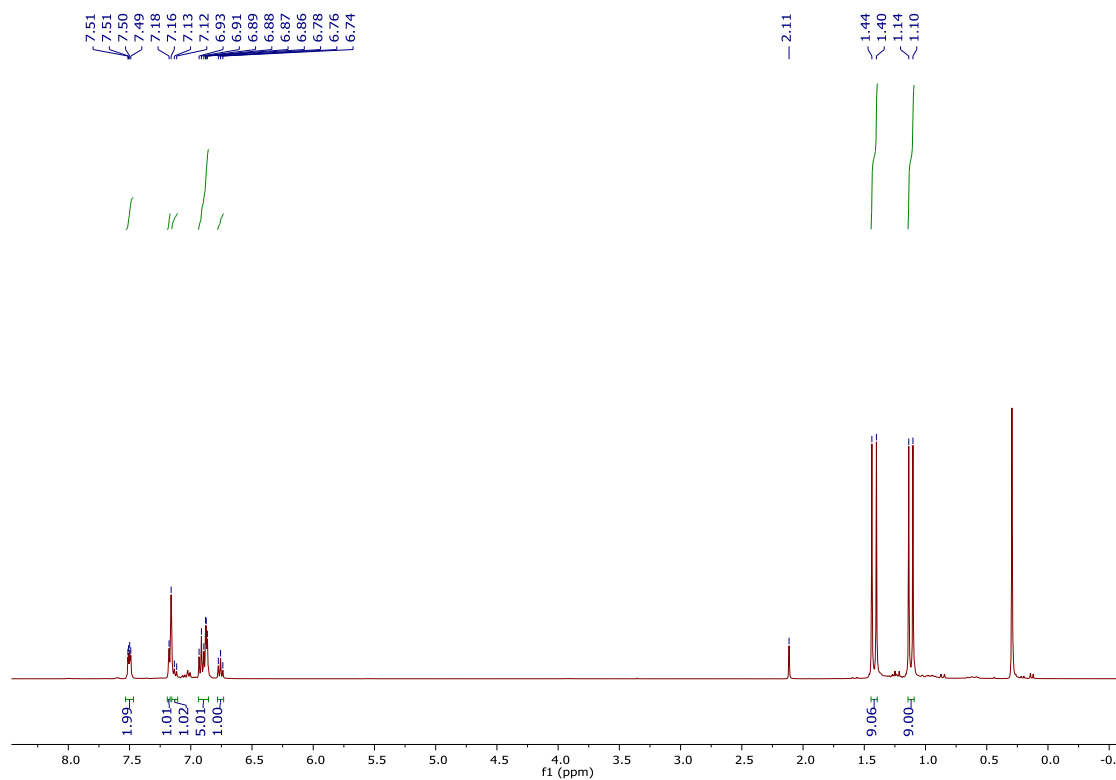

**Figure S4.**  $^1\text{H}$  NMR spectrum of compound **3** (in  $\text{C}_6\text{D}_6$ ).



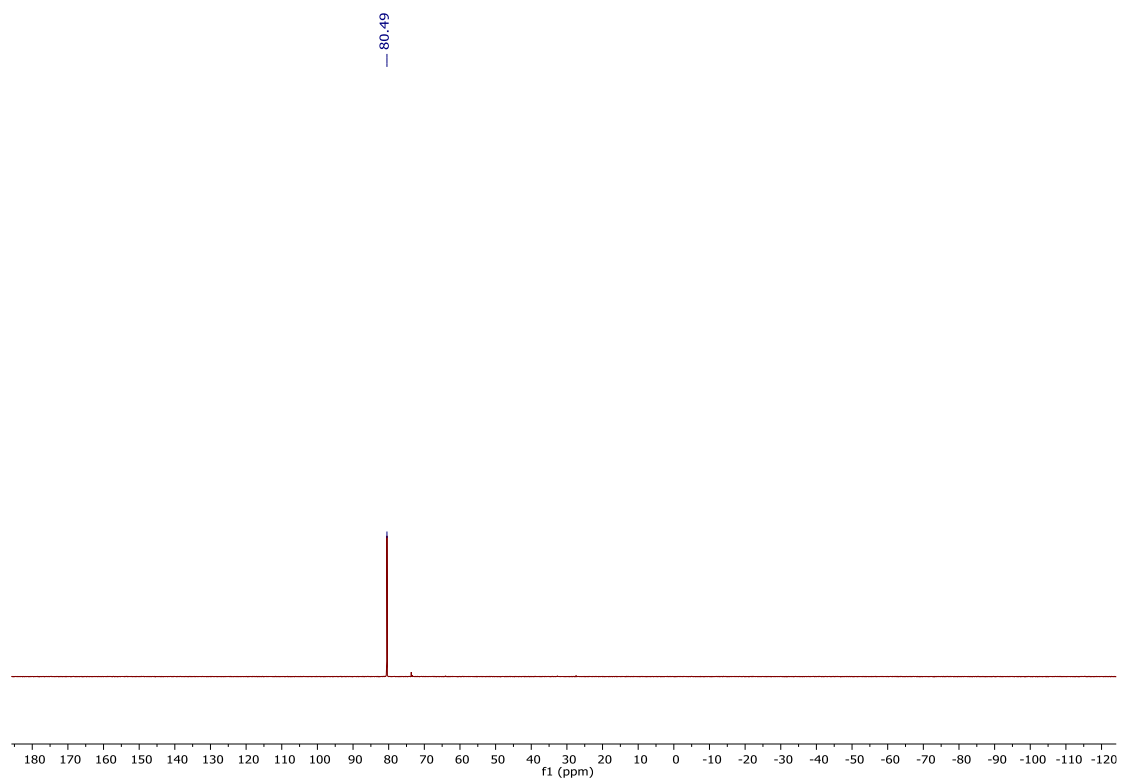

**Figure S5.**  $^{31}\text{P}\{^1\text{H}\}$  NMR spectrum of compound **3** (in  $\text{C}_6\text{D}_6$ ).

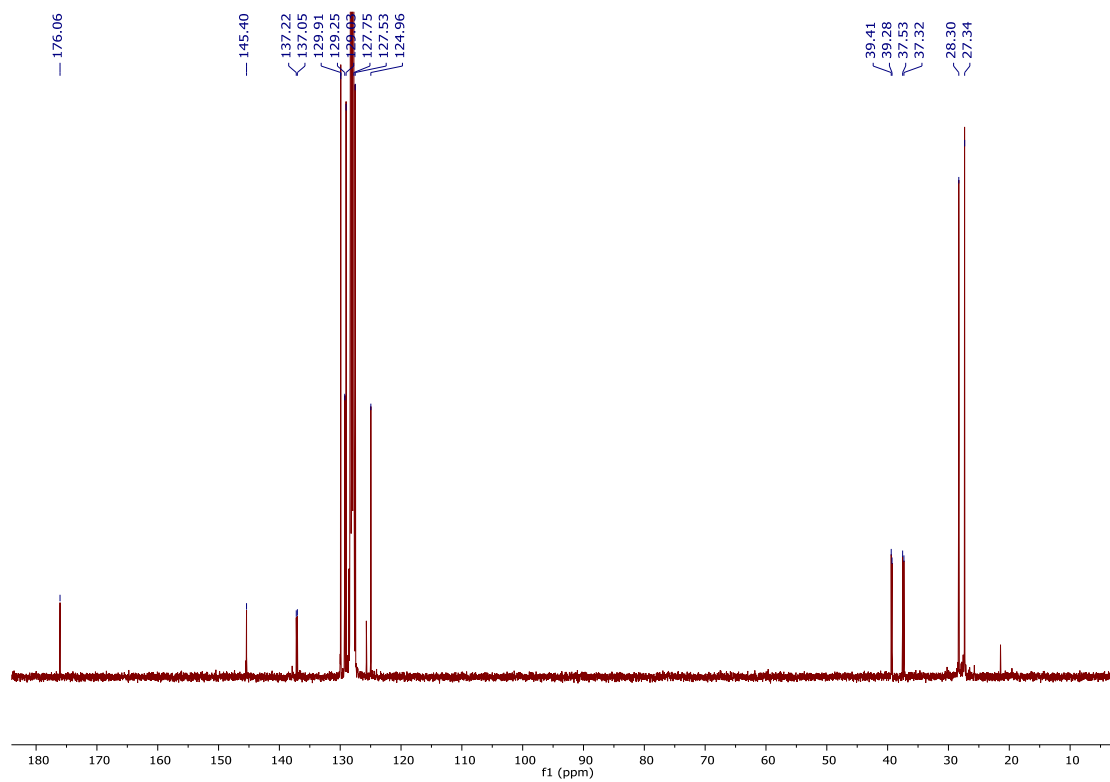

**Figure S6.**  $^{13}\text{C}\{^1\text{H}\}$  NMR spectrum of compound **3** (in  $\text{C}_6\text{D}_6$ ).

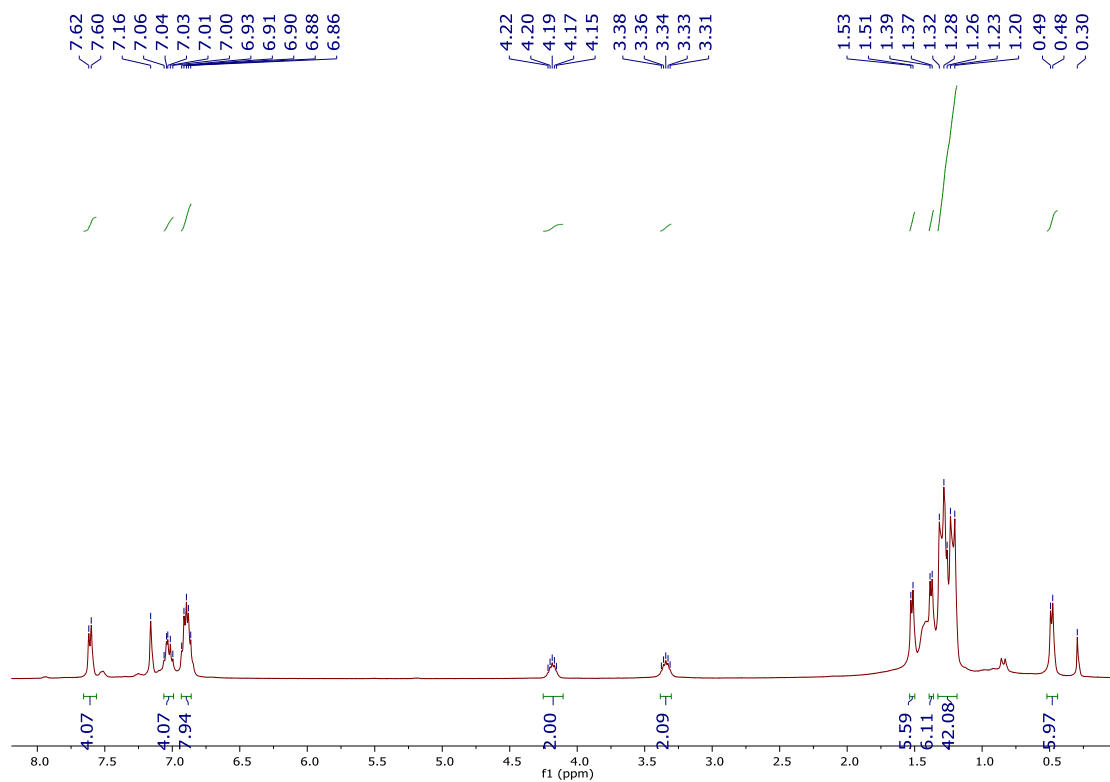

**Figure S7.**  $^1\text{H}$  NMR spectrum of compound **4** (in  $\text{C}_6\text{D}_6$ ).

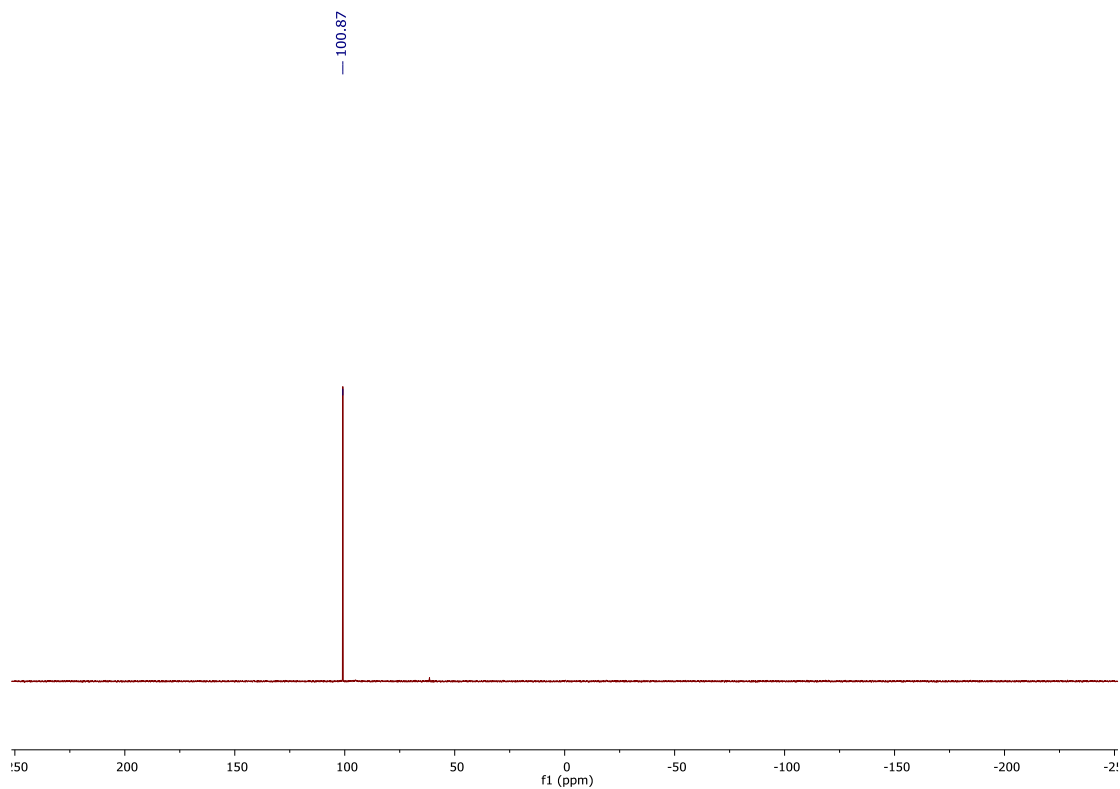

**Figure S8.**  $^{31}\text{P}\{^1\text{H}\}$  NMR spectrum of compound **4** (in  $\text{C}_6\text{D}_6$ ).

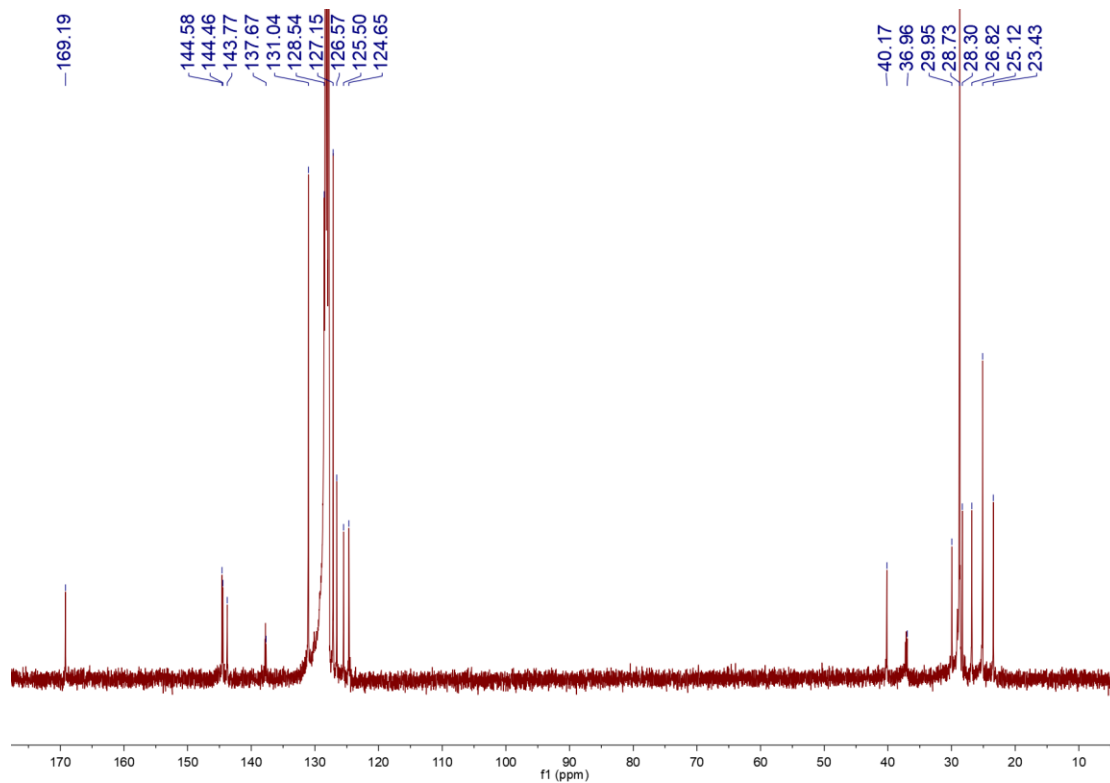

**Figure S9.**  $^{13}\text{C}\{^1\text{H}\}$  NMR spectrum of compound **4** (in  $\text{C}_6\text{D}_6$ ).

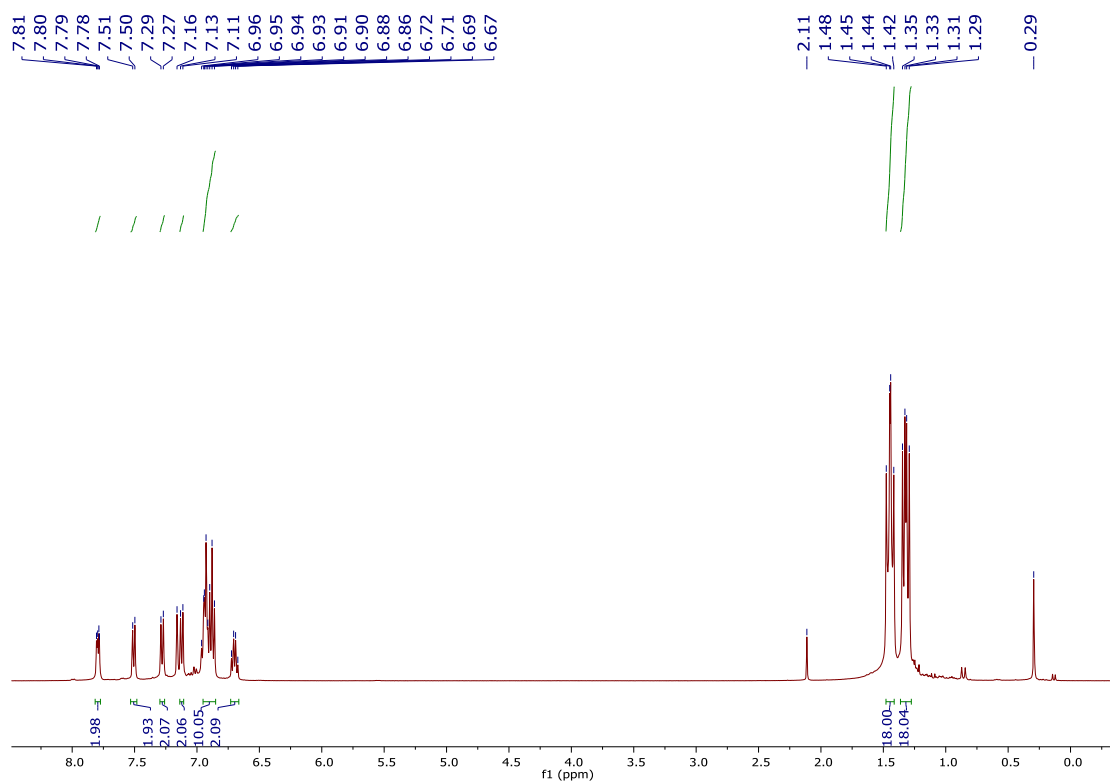

**Figure S10.**  $^1\text{H}$  NMR spectrum of compound **5** (in  $\text{C}_6\text{D}_6$ ).

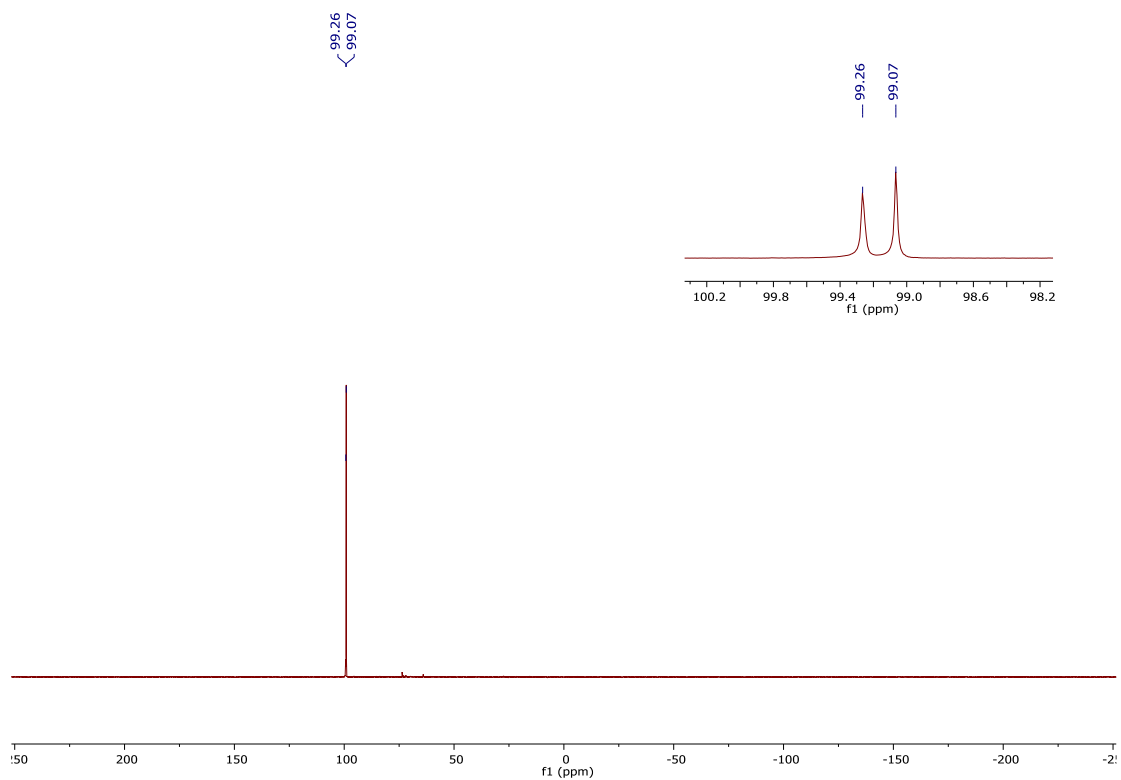

**Figure S11.**  $^{31}\text{P}\{^1\text{H}\}$  NMR spectrum of compound **5** (in  $\text{C}_6\text{D}_6$ ).

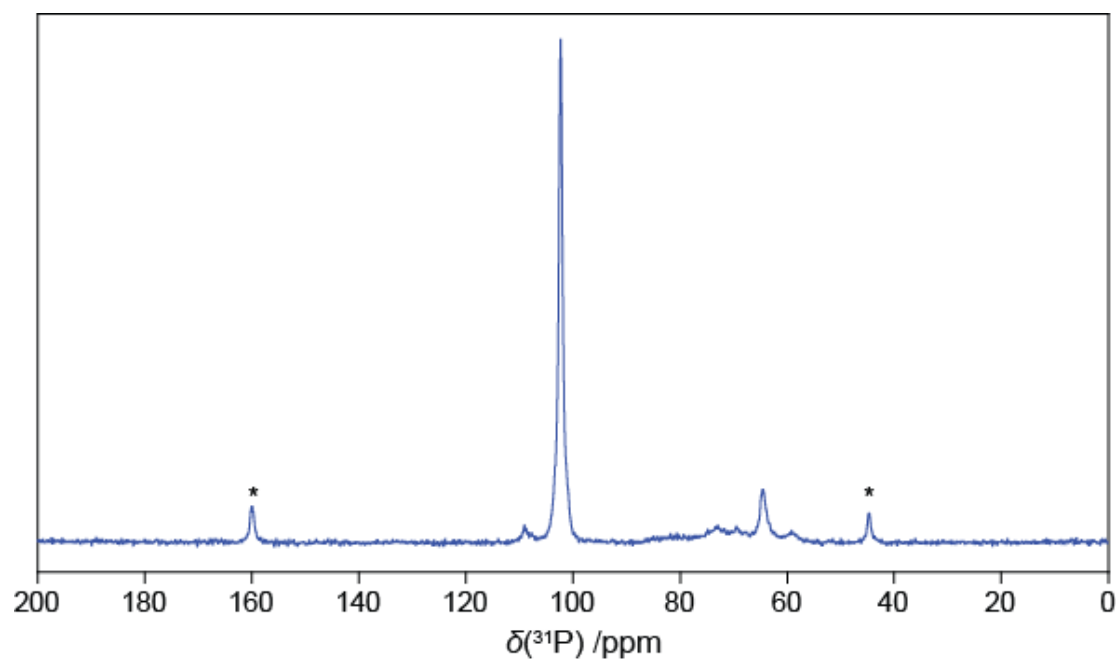

**Figure S12.** Solid state  $^{31}\text{P}\{^1\text{H}\}$  CPMAS NMR of compound **5**. (\*: MAS spinning sidebands; 65ppm: free ligand).

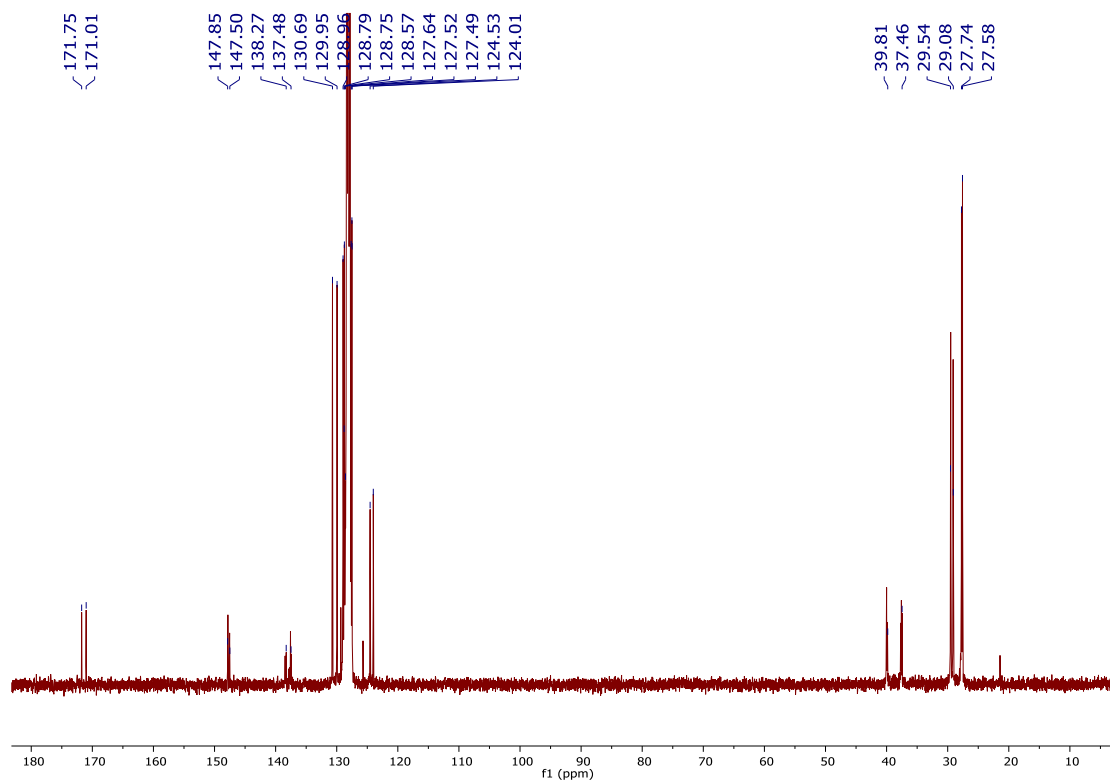

**Figure S13.**  $^{13}\text{C}\{^1\text{H}\}$  NMR spectrum of compound **5** (in  $\text{C}_6\text{D}_6$ ).

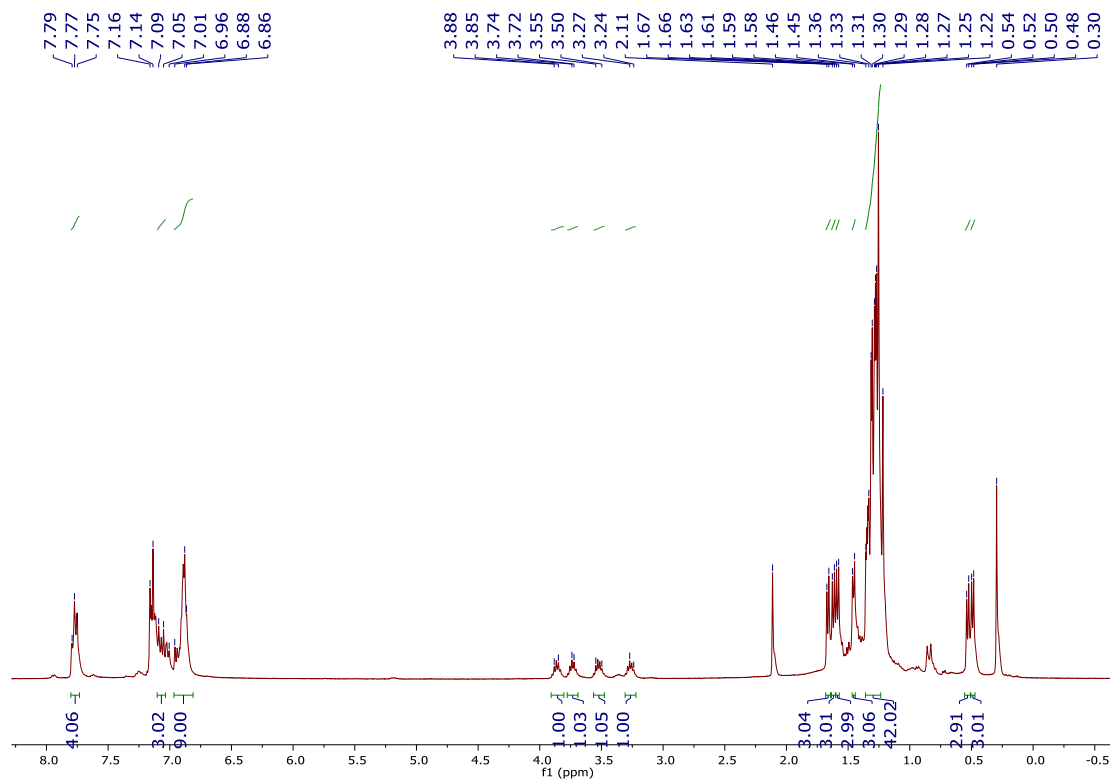

**Figure S14.**  $^1\text{H}$  NMR spectrum of compound **6** (in  $\text{C}_6\text{D}_6$ ).

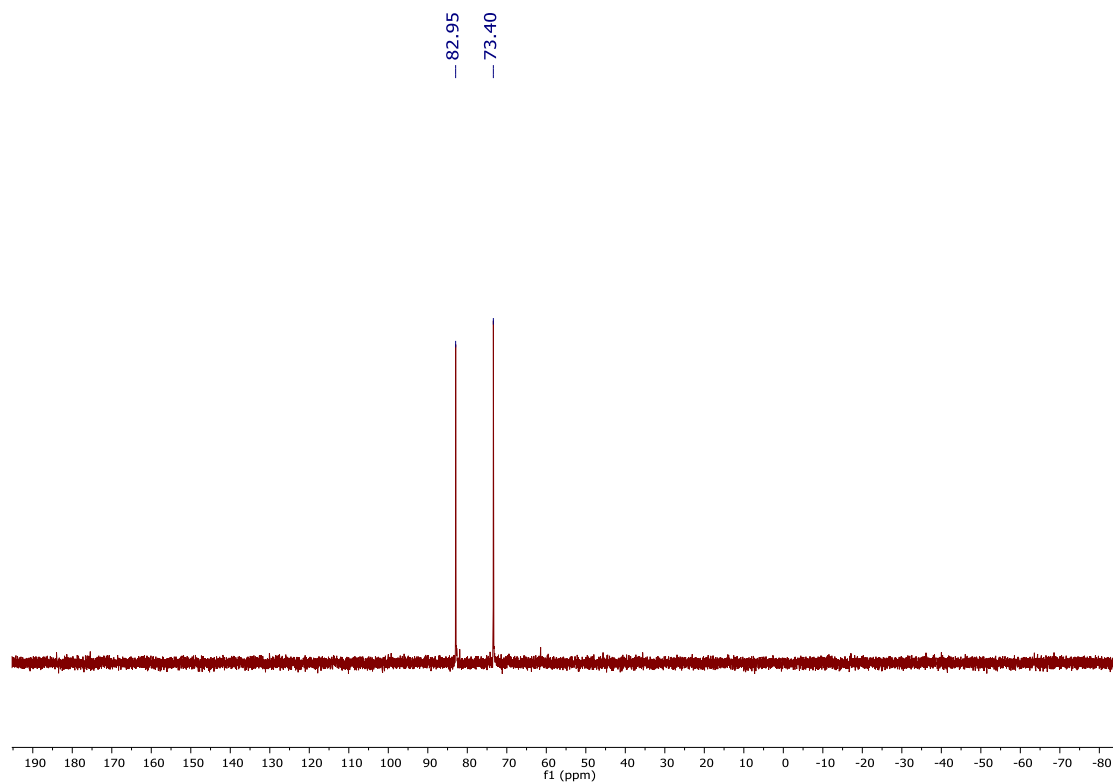

**Figure S15.**  $^{31}\text{P}\{^1\text{H}\}$  NMR spectrum of compound **6** (in  $\text{C}_6\text{D}_6$ ).

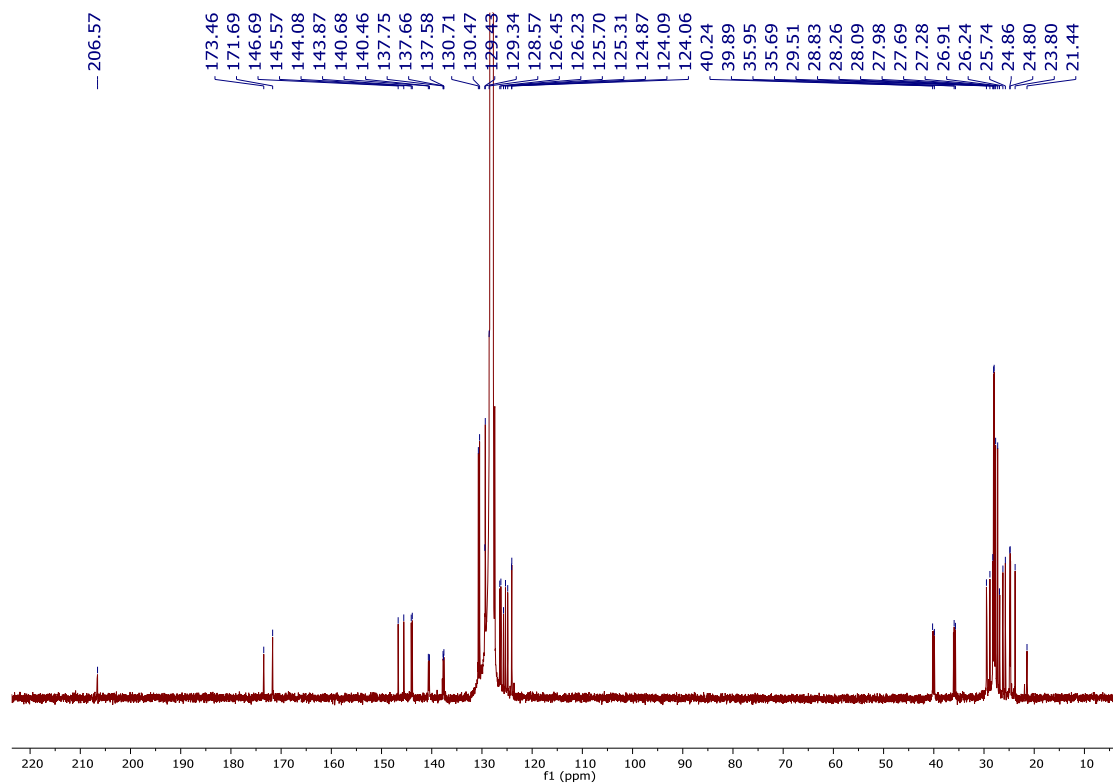

**Figure S16.**  $^{13}\text{C}\{^1\text{H}\}$  NMR spectrum of compound **6** (in  $\text{C}_6\text{D}_6$ ).

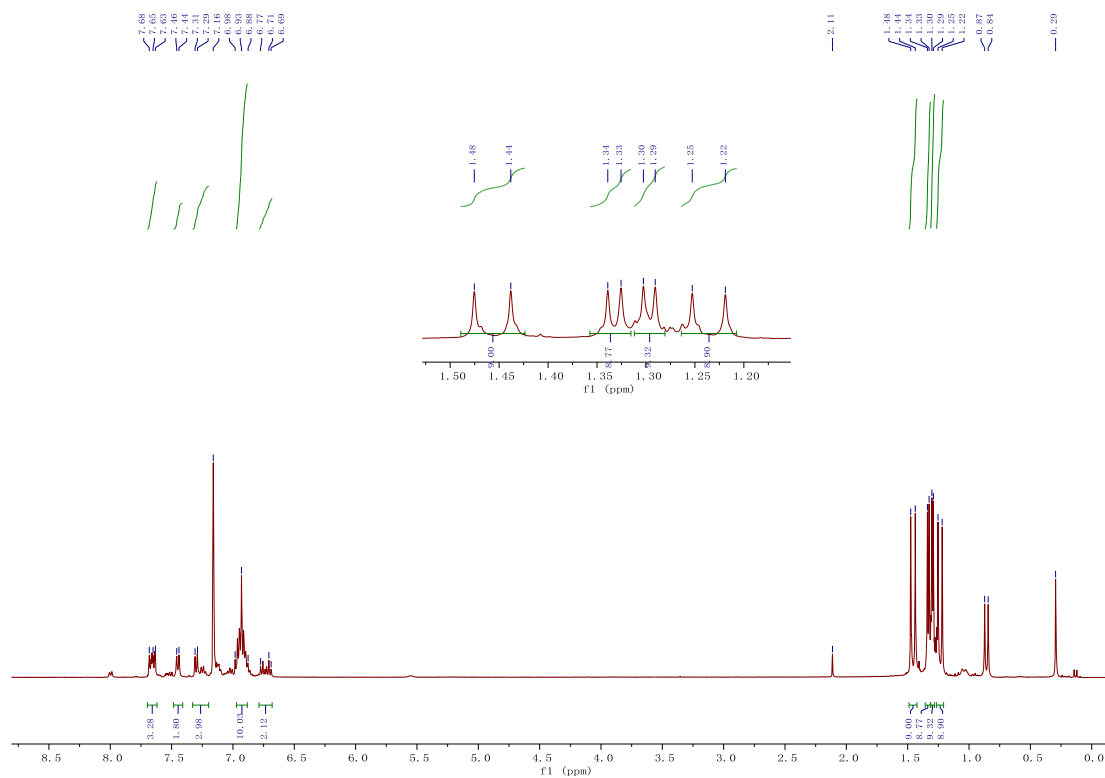

**Figure S17.  $^1\text{H}$  NMR of compound 7 in  $\text{C}_6\text{D}_6$ .**

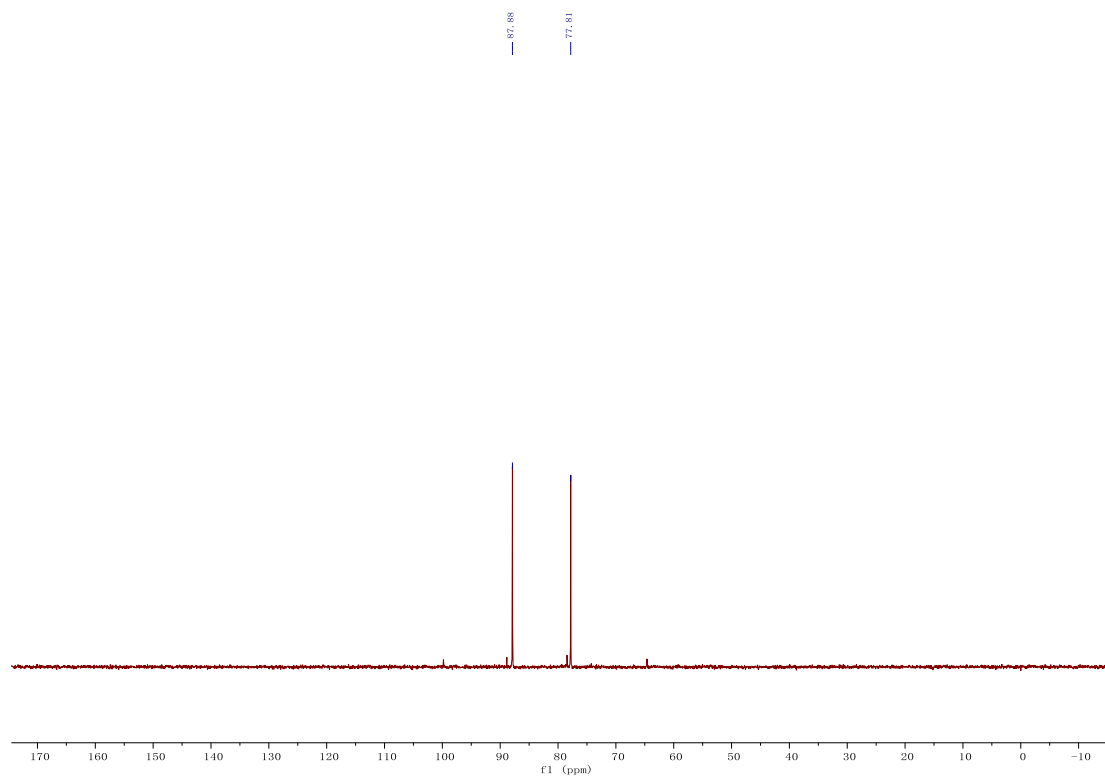

**Figure S18.  $^{31}\text{P}\{^1\text{H}\}$  NMR spectrum of compound 7 (in  $\text{C}_6\text{D}_6$ ).**

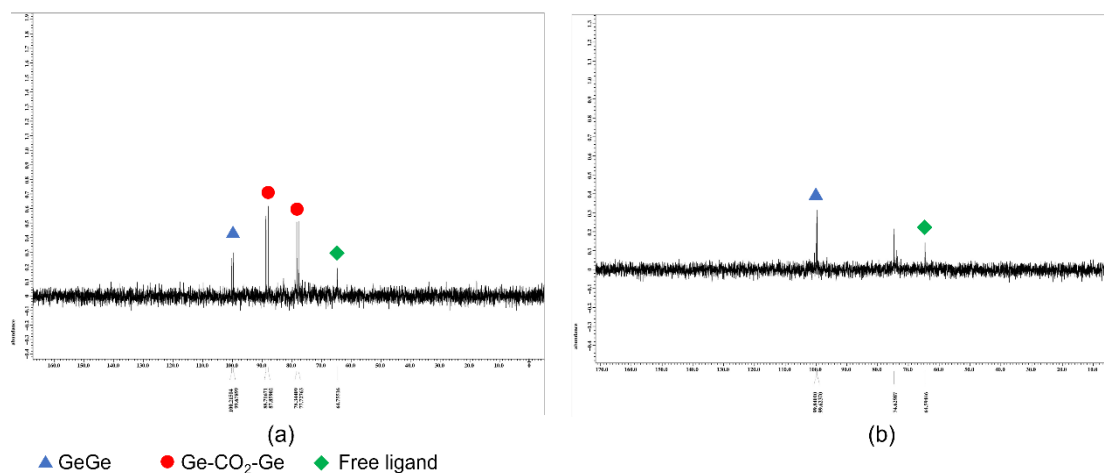

**Figure S19.**  $^{31}\text{P}\{^1\text{H}\}$  NMR spectrum of compound **7** after  $\text{CO}_2$  was removed ( $\text{C}_6\text{D}_6$ ). (a): 2 h. (b): 5 h.

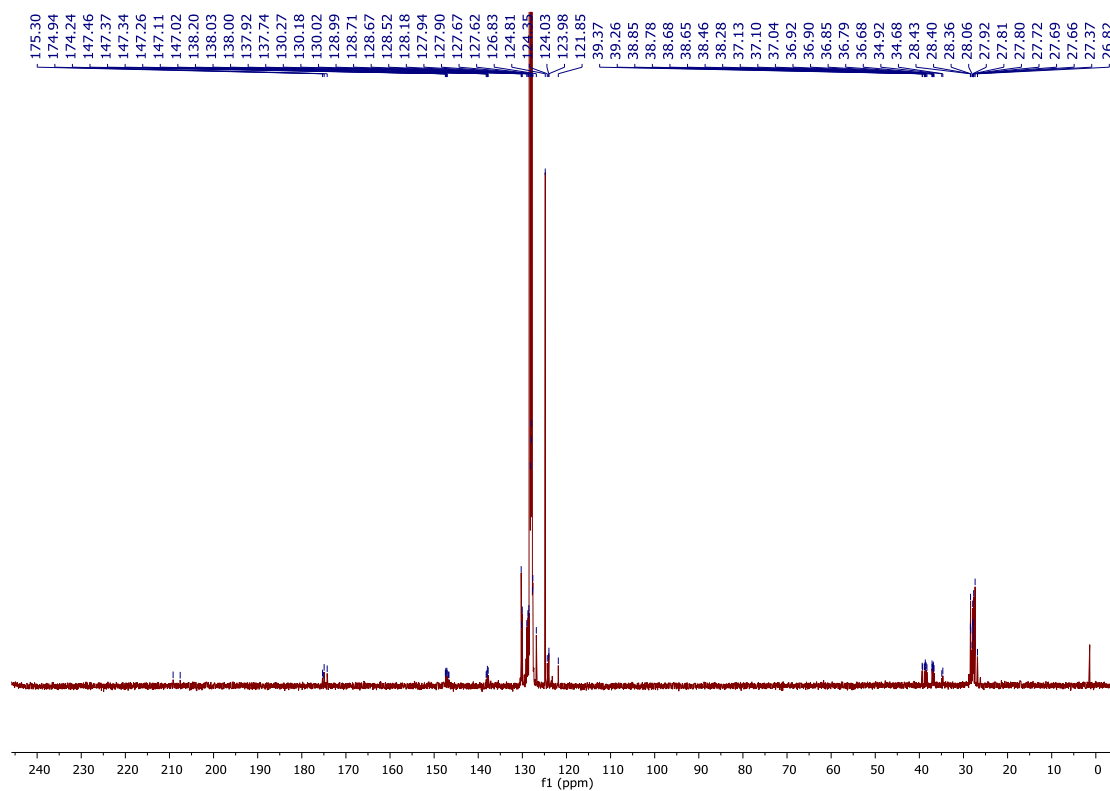

**Figure S20.**  $^{13}\text{C}\{^1\text{H}\}$  NMR spectrum of compound **7** (in  $\text{C}_6\text{D}_6$ ).



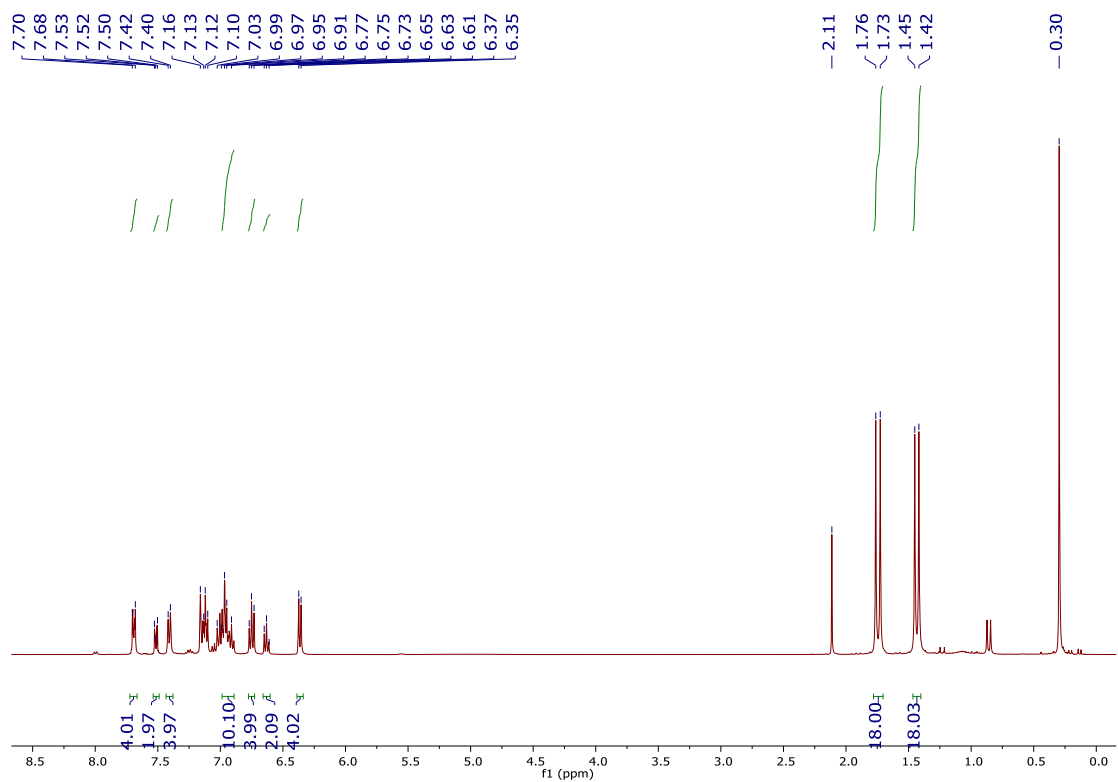

**Figure S21.**  $^1\text{H}$  NMR spectrum of compound **8** (in  $\text{C}_6\text{D}_6$ ).

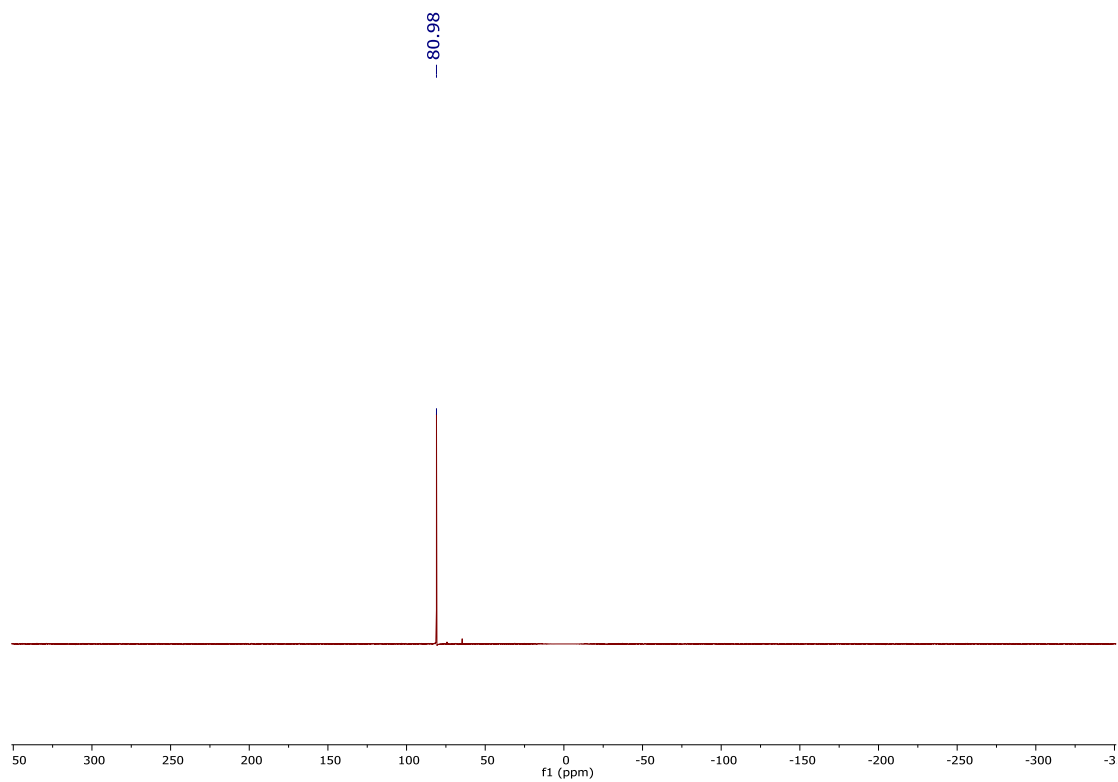

**Figure S22.**  $^{31}\text{P}\{^1\text{H}\}$  NMR spectrum of compound **8** (in  $\text{C}_6\text{D}_6$ ).

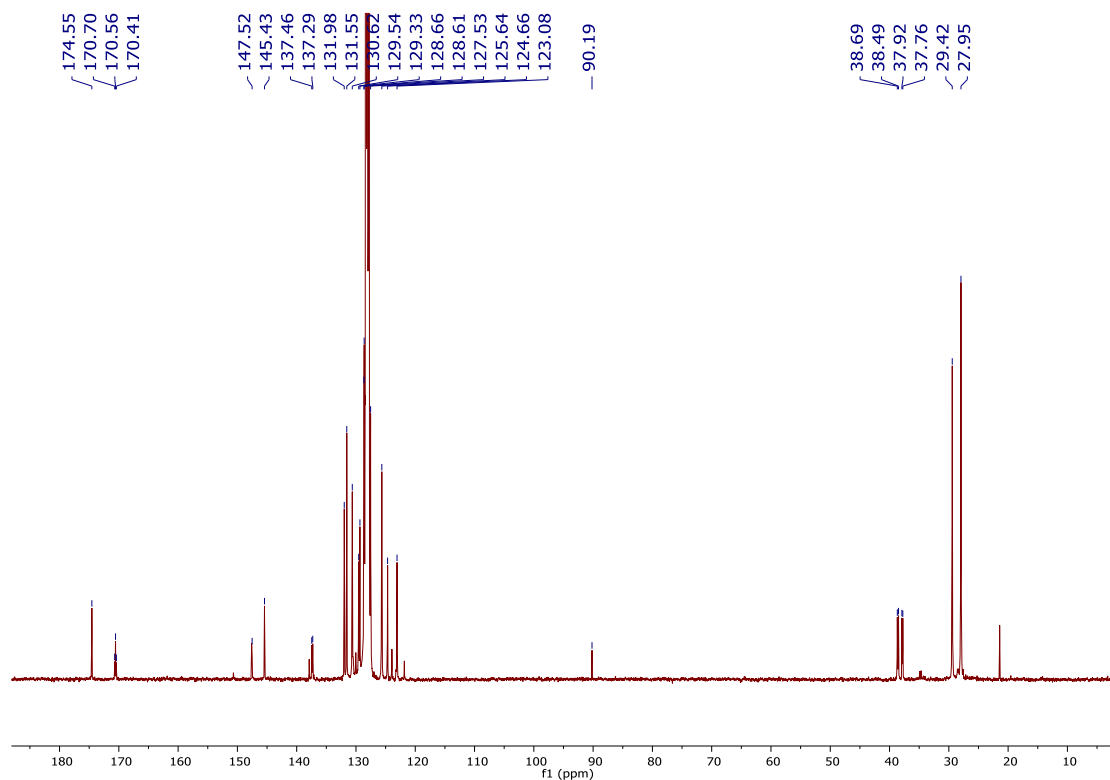

**Figure S23.**  $^{13}\text{C}\{^1\text{H}\}$  NMR spectrum of compound **8** (in  $\text{C}_6\text{D}_6$ ).

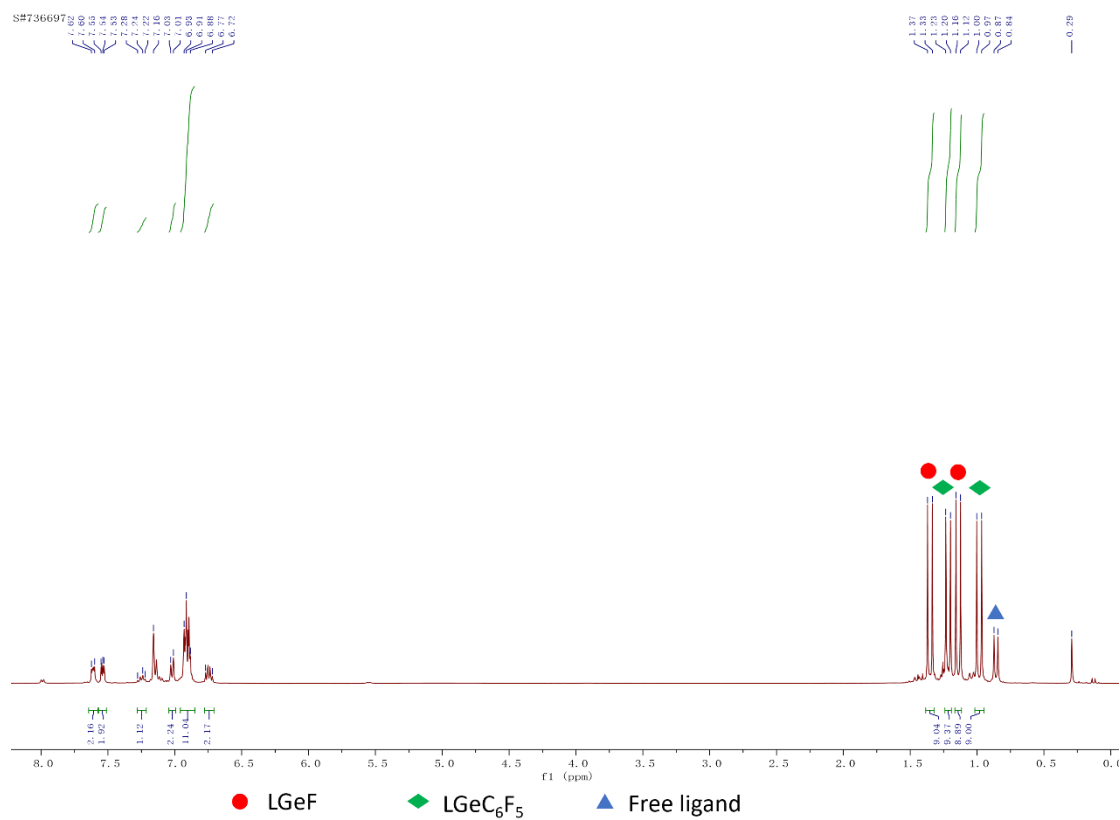

**Figure S24.**  $^1\text{H}$  NMR spectrum of compound **9** (LGeF) and **10** (LGeC<sub>6</sub>F<sub>5</sub>) (in  $\text{C}_6\text{D}_6$ ).

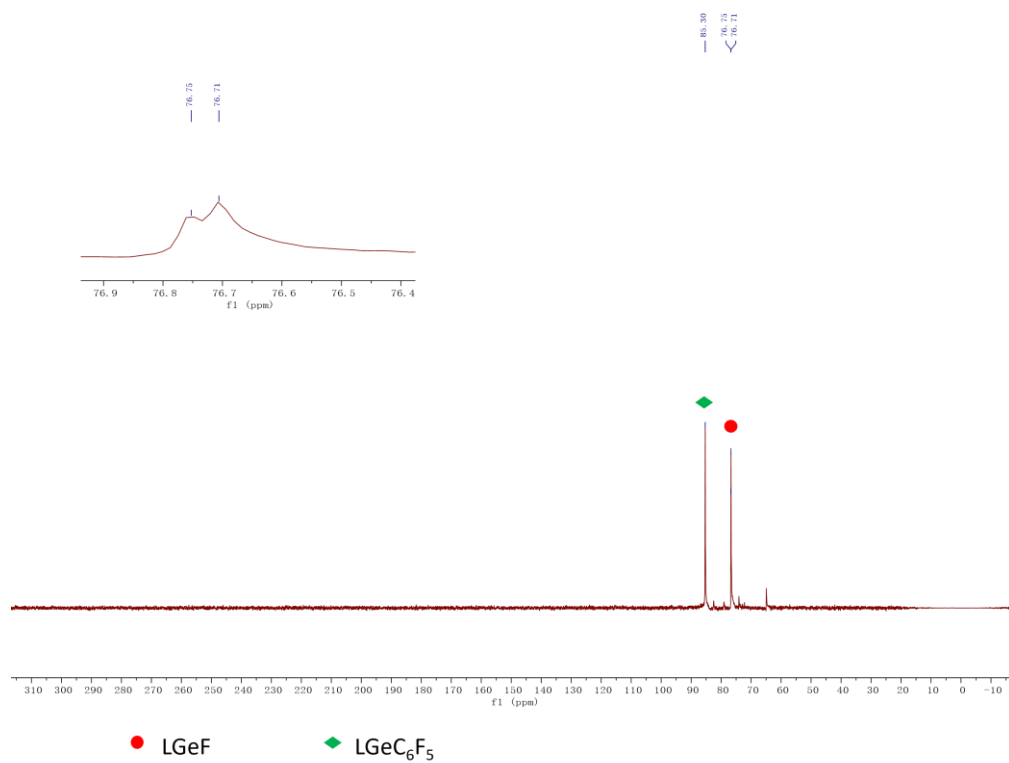

**Figure S25.**  $^{31}\text{P}\{^1\text{H}\}$  NMR spectrum of compound **9** (LGeF) and **10** (LGeC<sub>6</sub>F<sub>5</sub>) (in C<sub>6</sub>D<sub>6</sub>).



### S3. IR Spectra

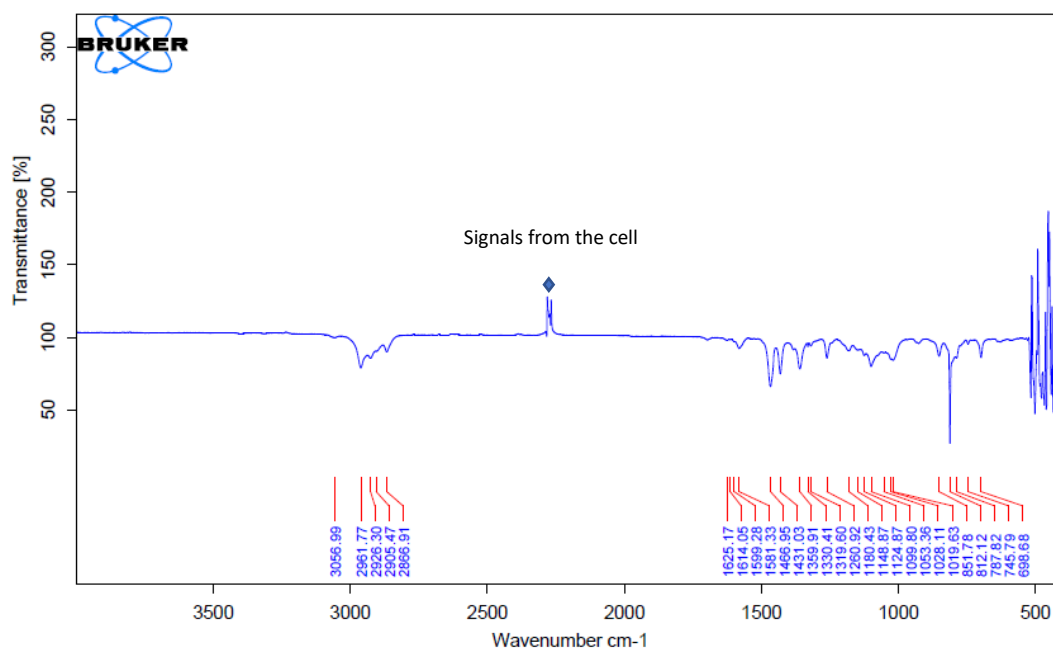

Figure S28. FTIR of compound **6** (in benzene).

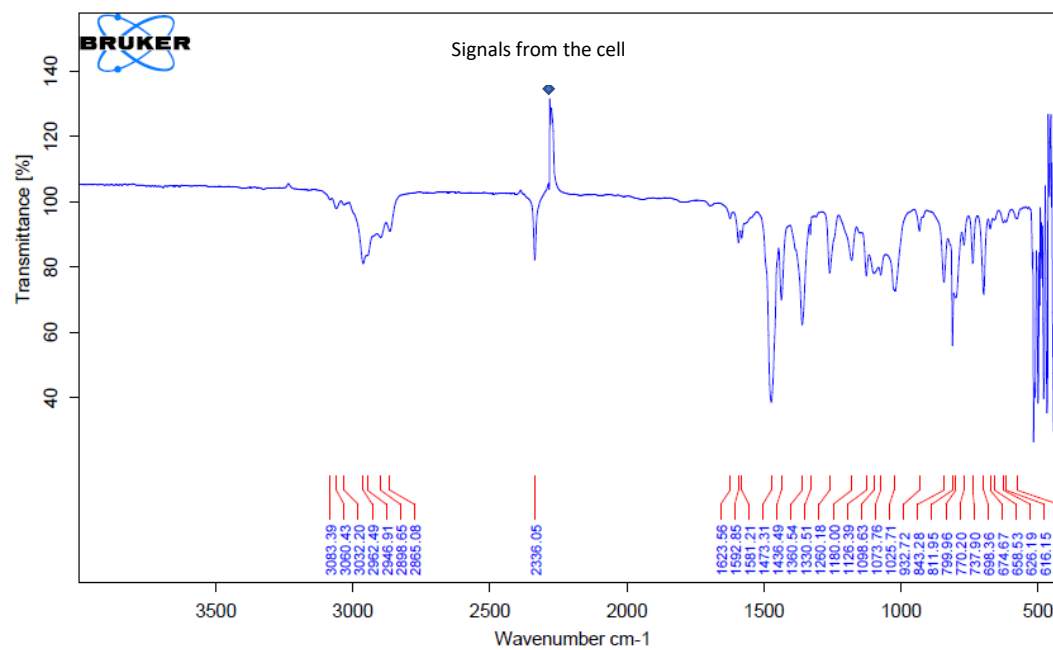

Figure S29. FTIR of compound **7** (in benzene).

## S4. VT-NMR studies for **5**

### Interconversion of the conformers for **5**

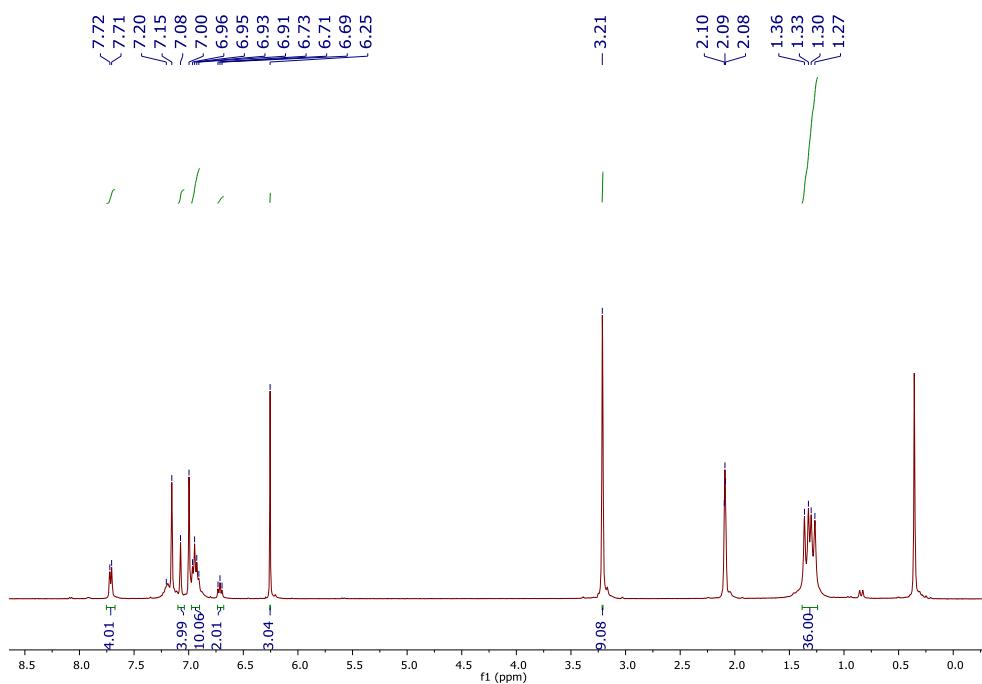

**Figure S30.**  $^1\text{H}$  NMR of **5** at  $-70^\circ\text{C}$  in  $\text{C}_7\text{D}_8$ , where only 1 conformer is observed

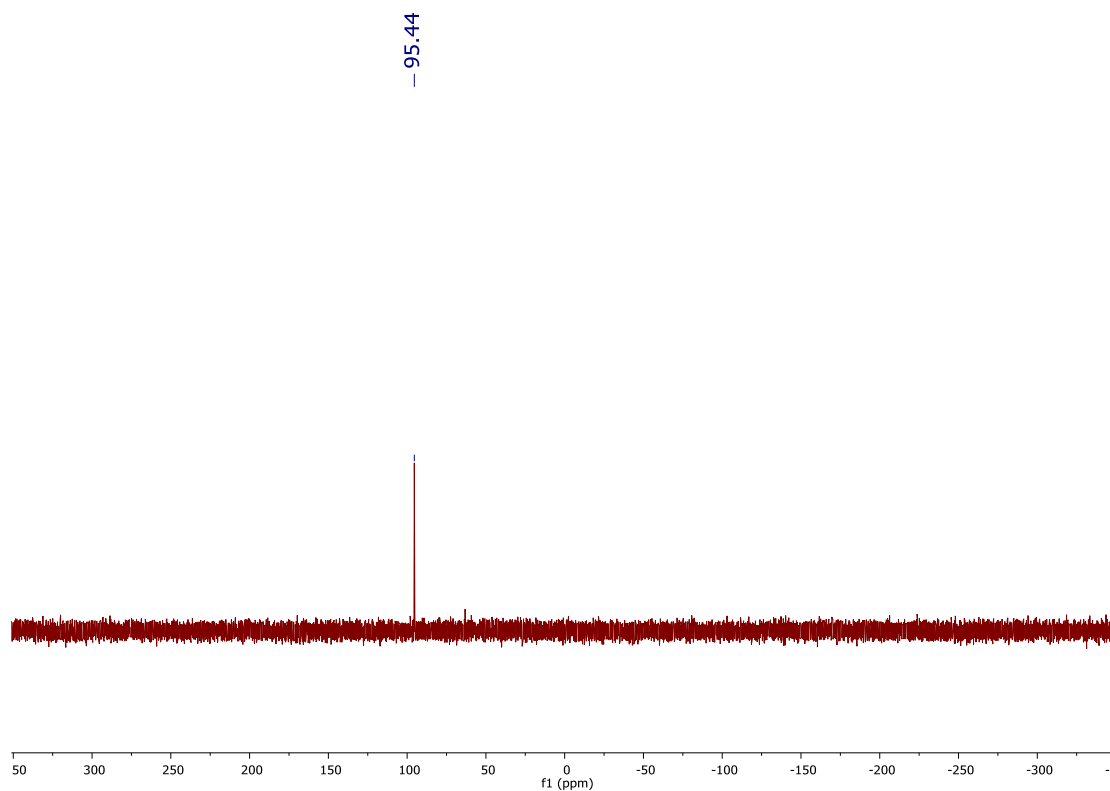

**Figure S31.**  $^{31}\text{P}\{^1\text{H}\}$  NMR of **5** at  $-70^\circ\text{C}$  in  $\text{C}_7\text{D}_8$ , where only 1 conformer is observed

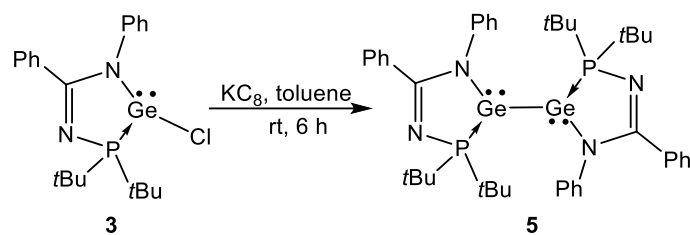

**Table S1.**  $^1\text{H}$  NMR data and concentration of Conformer **A** and Conformer **B** at  $25^\circ\text{C}$  in  $\text{C}_7\text{D}_8$ .

| Int (A) | Int (B) | Int (IS) | Time (min) | [A]/ mmol/L | [B]/ mmol/L |
|---------|---------|----------|------------|-------------|-------------|
| 23.3    | 12.7    | 3.00     | 0          | 10.9        | 5.94        |
| 20.7    | 15.3    | 2.99     | 15         | 9.71        | 7.19        |
| 19.7    | 16.3    | 3.00     | 30         | 9.23        | 7.61        |
| 19.1    | 16.9    | 3.05     | 45         | 8.80        | 7.77        |
| 18.7    | 17.3    | 3.03     | 60         | 8.69        | 7.99        |
| 18.4    | 17.6    | 3.05     | 75         | 8.46        | 8.11        |
| 18.0    | 18.0    | 3.01     | 90         | 8.40        | 8.39        |

**Conditions:**  $\text{C}_7\text{D}_8$  (0.6 mL), 1,3,5-trimethoxybenzene (internal standard: 0.0017g, 0.0168 mol/L), concentration of **5**: 0.0166 mol/L, under argon,  $25^\circ\text{C}$  (Int: integration; [A] and [B]: concentration of conformers **A** and **B**)

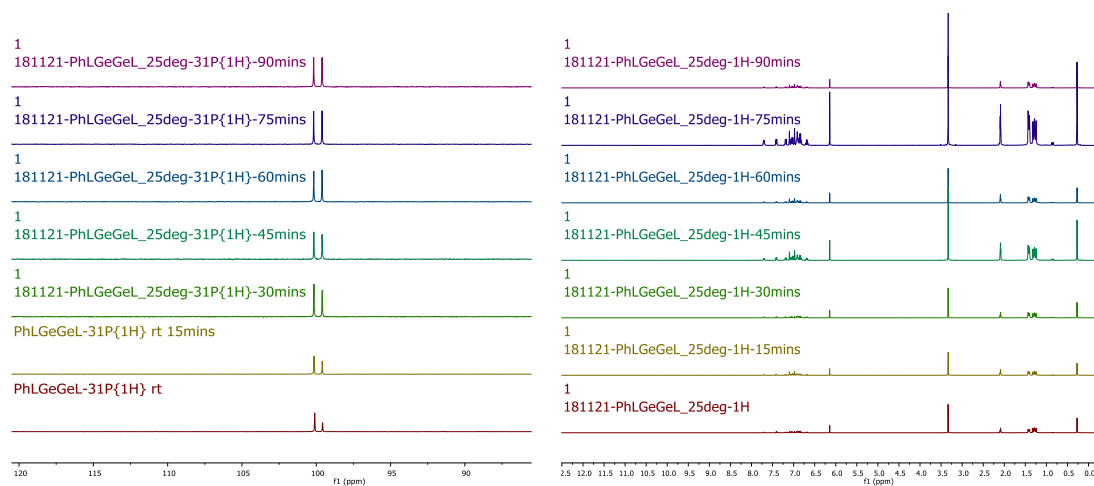

**Figure S32.** Stacked  $^1\text{H}$  NMR and  $^{31}\text{P}\{^1\text{H}\}$  spectra of the interconversion of the conformers for **5** at  $25^\circ\text{C}$

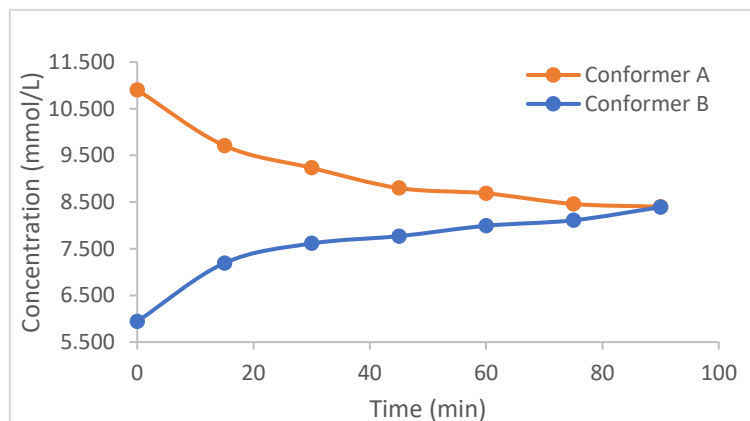

**Figure S33.** Concentration versus time plot of the interconversion of conformers **A** and **B** at 25°C

**Table S2.** Variable Temperature  $^1\text{H}$  NMR data and Reaction Equilibrium Constant  $K$  of the above interconversion.

| Int (A) | Int (B) | Int (IS) | T (K) | 1/T (K <sup>-1</sup> ) | [A]/ mmol/L | [B]/ mmol/L | $K$    | lnK   |
|---------|---------|----------|-------|------------------------|-------------|-------------|--------|-------|
| 34.2    | 1.78    | 3.00     | 263   | 0.00380                | 16.0        | 0.833       | 0.0520 | -2.96 |
| 34.1    | 1.86    | 3.01     | 273   | 0.00366                | 15.9        | 0.867       | 0.0545 | -2.91 |
| 32.2    | 3.83    | 2.99     | 283   | 0.00353                | 15.1        | 1.798       | 0.1191 | -2.13 |
| 27.2    | 8.81    | 3.02     | 293   | 0.00341                | 12.6        | 4.095       | 0.3240 | -1.13 |
| 23.3    | 12.70   | 3.00     | 298   | 0.00336                | 10.9        | 5.943       | 0.5451 | -0.61 |

**Condition:** C<sub>7</sub>D<sub>8</sub> (0.6 mL), 1,3,5-trimethoxybenzene (internal standard: 0.0017g, 0.0168 mol/L), concentration of **5**: 0.0166 mol/L, under argon, 25°C (Int: integration; [A] and [B]: concentration of conformers **A** and **B**;  $K$ : reaction equilibrium constant).

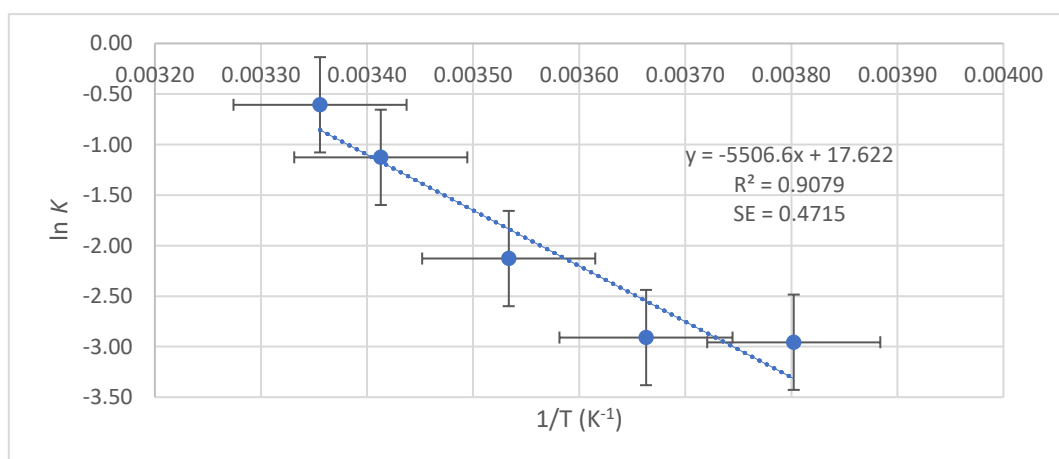

**Figure S34.** Plot of  $\ln K$  versus  $T^{-1}$  for the interconversion

From the obtained linear equation,  $\Delta H = 45.78$  kJ/mol,  $\Delta S = 146.52$  J/mol.K  
 At 298.13K,  $\Delta G = \Delta H - T\Delta S = 2.10$  kJ/mol = 0.50 kcal/mol



## S4. Reversible Activation of Carbon Dioxide

### The Reversible Activation of Carbon Dioxide by Compound 4.

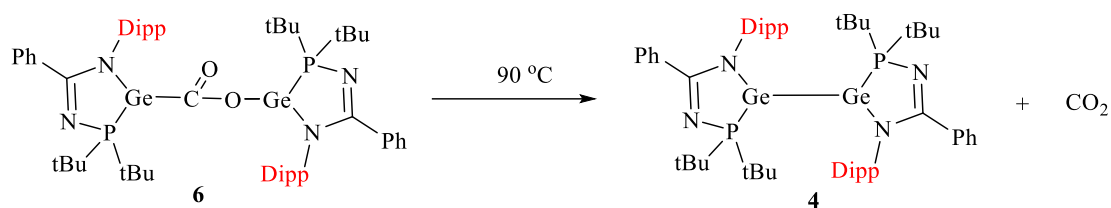

**Table S3.** <sup>1</sup>H NMR data and concentration of 4 [GeGe] and 6 [Ge-CO<sub>2</sub>-Ge] at 90 °C in C<sub>6</sub>D<sub>6</sub>.

| Int(Ge-CO <sub>2</sub> -Ge) | Int(GeGe) | Int(Tol) | Time(min) | [GeGe]/mmol/L | [Ge-CO <sub>2</sub> -Ge]/mmol/L |
|-----------------------------|-----------|----------|-----------|---------------|---------------------------------|
| 0.35                        | 0.29      | 3        | 30        | 1.97          | 2.38                            |
| 0.24                        | 0.4       | 3        | 60        | 2.72          | 1.63                            |
| 0.19                        | 0.43      | 3        | 90        | 2.92          | 1.29                            |
| 0.17                        | 0.45      | 3        | 120       | 3.06          | 1.16                            |
| 0.16                        | 0.45      | 3        | 240       | 3.06          | 1.09                            |
| 0.16                        | 0.46      | 3        | 360       | 3.12          | 1.09                            |

**Condition:** C<sub>6</sub>D<sub>6</sub> (0.4 mL), Toluene (internal standard: 0.0010 g, 0.027 mol/L), concentration of Ge-CO<sub>2</sub>-Ge (6): 4.58 mmol/L, under argon, 90 °C. (Int: integration; [GeGe] and [Ge-CO<sub>2</sub>-Ge]: concentration of 4 and 6).

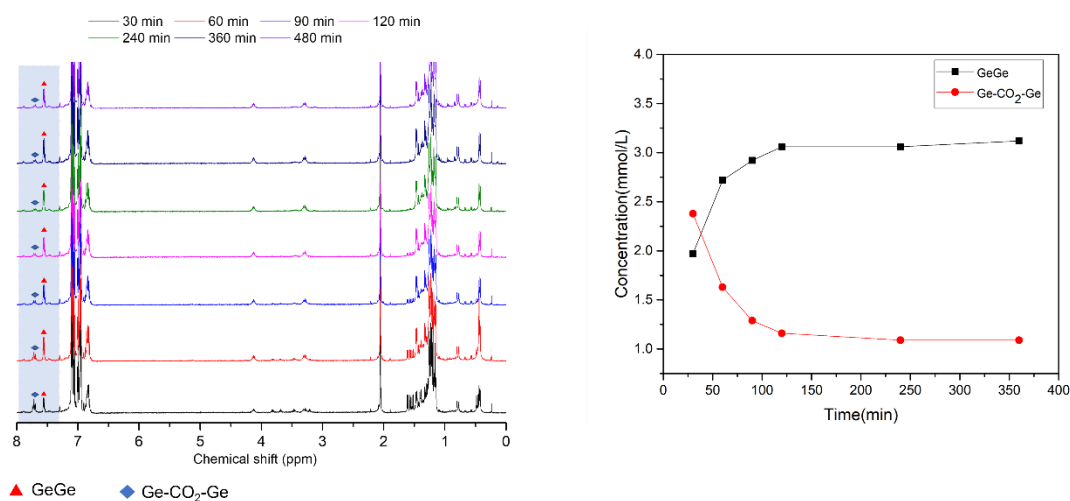

**Figure S35.** Stacked <sup>1</sup>H NMR spectrum and concentration versus time plot of the reversible activation of carbon dioxide by 4 at 90 °C in C<sub>6</sub>D<sub>6</sub>.

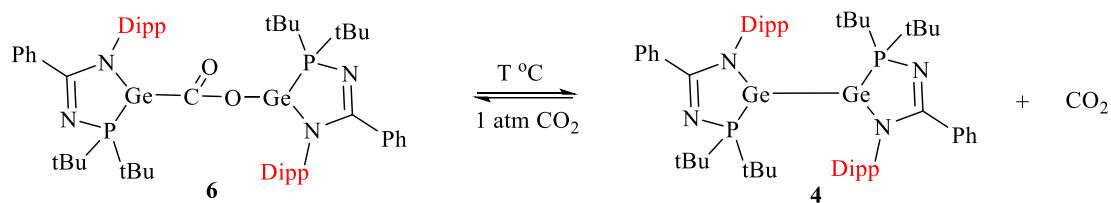

**Table S4.** Variable Temperature  $^1\text{H}$  NMR data and Reaction Equilibrium Constant  $K$  of the above reversible reaction.

| Int(Ge-CO <sub>2</sub> -Ge) | Int(GeGe) | Int(Tol) | T °C/K  | 1/T K <sup>-1</sup>   | [GeGe]/mmol/L | [Ge-CO <sub>2</sub> -Ge]/mmol/L | K     | LnK    |
|-----------------------------|-----------|----------|---------|-----------------------|---------------|---------------------------------|-------|--------|
| 0.97                        | 0.12      | 3        | 80/353  | 2.83*10 <sup>-3</sup> | 1.67          | 13.31                           | 0.125 | -2.079 |
| 0.87                        | 0.21      | 3        | 85/358  | 2.79*10 <sup>-3</sup> | 2.86          | 12.02                           | 0.24  | -1.427 |
| 0.72                        | 0.37      | 3        | 90/363  | 2.75*10 <sup>-3</sup> | 5.02          | 9.83                            | 0.51  | -0.673 |
| 0.58                        | 0.50      | 3        | 95/368  | 2.72*10 <sup>-3</sup> | 6.83          | 8.03                            | 0.85  | -0.162 |
| 0.46                        | 0.60      | 3        | 100/373 | 2.68*10 <sup>-3</sup> | 8.31          | 6.29                            | 1.32  | 0.277  |
| 0.34                        | 0.71      | 3        | 105/378 | 2.64*10 <sup>-3</sup> | 9.75          | 4.68                            | 2.08  | 0.732  |

**Condition:** C<sub>6</sub>D<sub>6</sub> (0.4 mL), Toluene (internal standard, 2 mg, 0.022 mmol, 55 mmol/L), Ge-CO<sub>2</sub>-Ge (**6**, 6 mg, 0.006 mmol, 15 mmol/L), 1 atm CO<sub>2</sub>. (Int: integration; [GeGe] and [Ge-CO<sub>2</sub>-Ge]: concentration of **4** and **6**;  $K$ : reaction equilibrium constant).

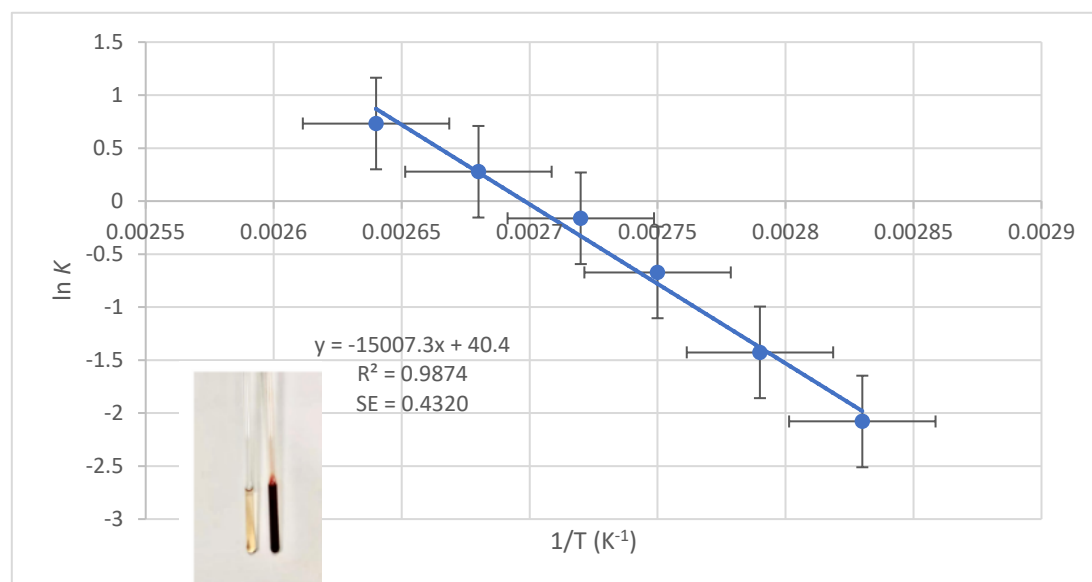

**Figure S36.** Plot of  $\ln K$  versus  $T^{-1}$  for the above reversible reaction.

$Y = aX + b$ ;  $a = -15007.3$ ,  $b = 40.4$ ;  $\Delta H = 124.8$  kJ/mol,  $\Delta S = 335.8$  J/(mol\*K)

At 298.15 K,  $\Delta G = \Delta H - T\Delta S = 24.7$  kJ/mol.

## The Reaction of Compound 7 with Diphenylacetylene or C<sub>6</sub>F<sub>6</sub>

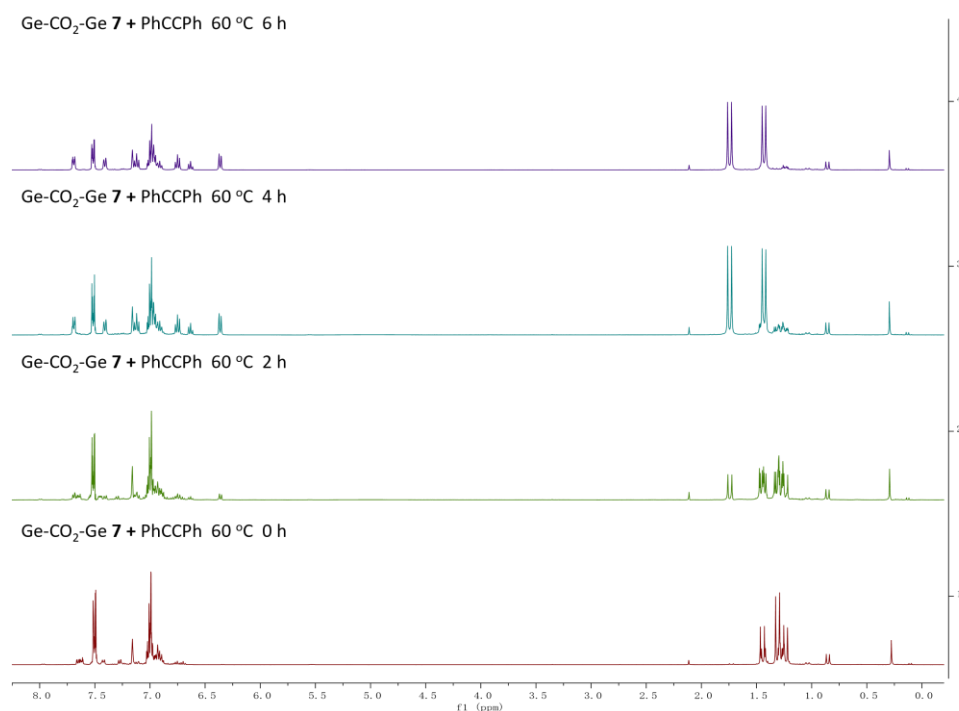

**Figure S37.** Stacked <sup>1</sup>H NMR spectrum of the reaction of compound 7 with diphenylacetylene.

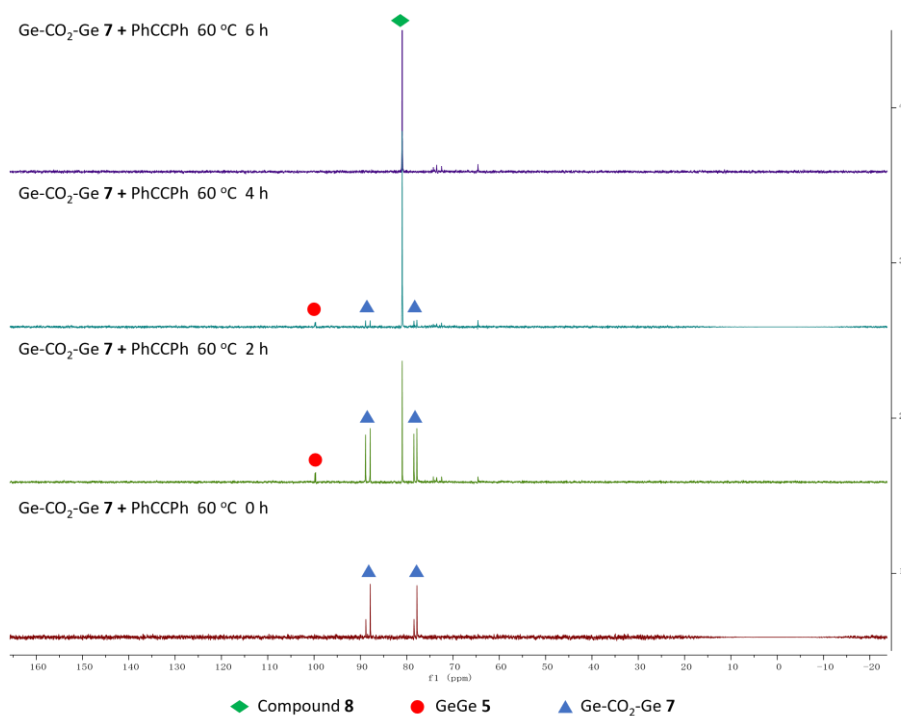

**Figure S38.** Stacked <sup>31</sup>P NMR spectrum of the reaction of compound 7 with diphenylacetylene.

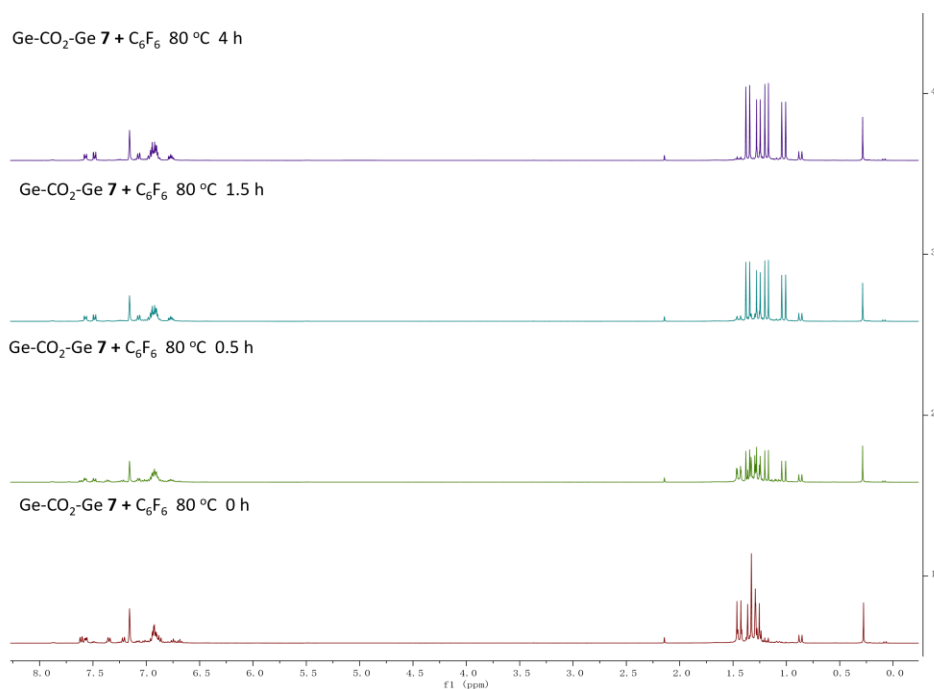

**Figure S39.** Stacked <sup>1</sup>H NMR spectrum of the reaction of compound **7** with C<sub>6</sub>F<sub>6</sub>

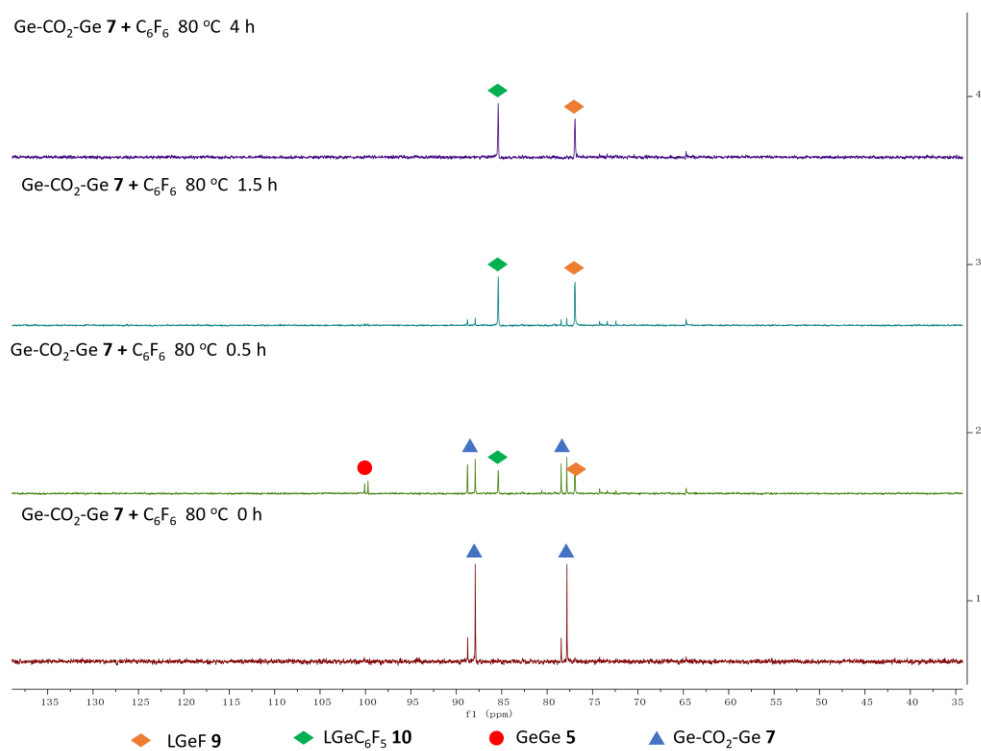

**Figure S40.** Stacked <sup>31</sup>P NMR spectrum of the reaction of compound **7** with C<sub>6</sub>F<sub>6</sub>

## S5. X-ray Data Collection and Structural Refinement

**X-ray data collection and structural refinement.** The X-ray diffraction intensity data were measured at 100 K with a Bruker APEX II diffractometer equipped with a CCD detector, employing Mo K  $\alpha$  radiation ( $\lambda = 0.71073 \text{ \AA}$ ), with the SMART suite of programs.<sup>4</sup> All data were processed and corrected for Lorentz and polarization effects with SAINT and for absorption effects with SADABS. Structural solution and refinement were carried out with the SHELXTL suite of programs.<sup>5</sup> The structures were solved by direct methods to locate the heavy atoms, followed by difference maps for the light, non-hydrogen atoms. All non-hydrogen atoms were refined with anisotropic thermal parameters. The  $R1$  ( $I > 2\sigma(I)$ ) values of compounds **2**, **4** and **8** are larger than 0.07 probably due to crystal decomposition during the X-ray diffraction analysis. CCDC-2109346 **2**, CCDC-2109347 **3**, CCDC-2109348 **4**, CCDC-2109349 **5**, CCDC-2109350 **6**, CCDC-2109351 **8** contain the supplementary crystallographic data for this paper. The data can be obtained free of charge from the Cambridge Crystallography Data Center via [www.ccdc.cam.ac.uk/data\\_request/cif](http://www.ccdc.cam.ac.uk/data_request/cif).

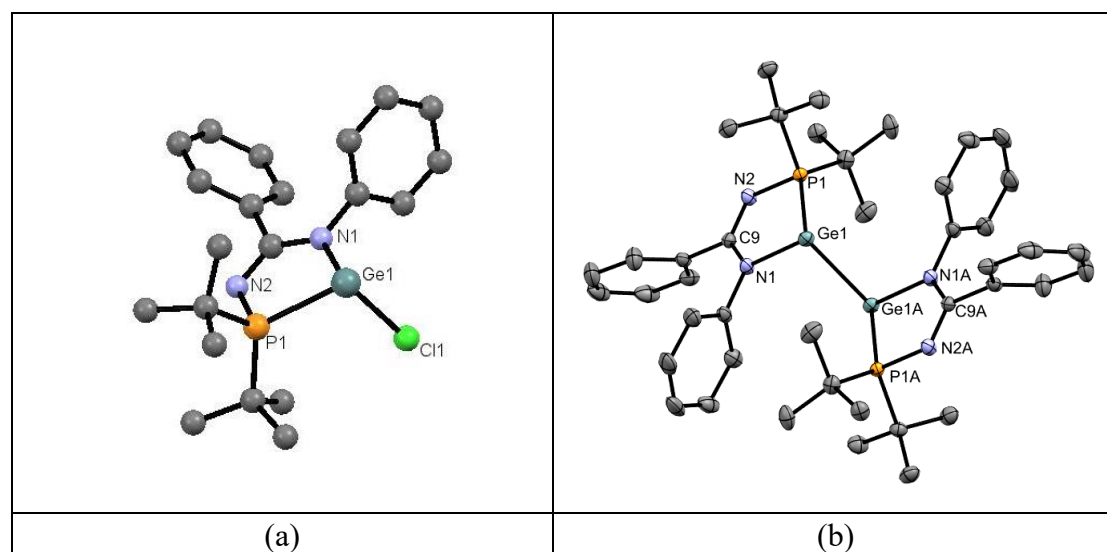

**Figure S41.** Molecular structures of **3** and **5** obtained by X-ray crystallography. Thermal ellipsoids are shown at 30 % probability. All hydrogen atoms are removed for clarity. (a) Selected bond lengths ( $\text{\AA}$ ) and angles (deg) of **3**: Ge1-N1 1.997(4), Ge1-P1 2.4712(13), Ge1-Cl1 2.2914(12), P1-Ge1-N1 76.94(11), P1-Ge1-Cl1 100.57(4), N1-Ge1-Cl1 95.51(11). (b) Selected bond lengths ( $\text{\AA}$ ) and angles (deg) of **5**: Ge1-Ge1A 2.5854(5), Ge1-P1 2.4512(6), Ge1-N1 2.0217(19), P1-Ge1-N1 78.26(5), P1-Ge1-Ge1A 103.661(19), N1-Ge1-Ge1A 93.98(6).

**Table S6.** X-Ray crystallographic data for compounds **2 - 4**.

|                                                               | <b>2</b>                                             | <b>3</b>                                             | <b>4</b>                                                                      |
|---------------------------------------------------------------|------------------------------------------------------|------------------------------------------------------|-------------------------------------------------------------------------------|
| Formula                                                       | C <sub>27</sub> H <sub>40</sub> ClGeN <sub>2</sub> P | C <sub>21</sub> H <sub>28</sub> ClGeN <sub>2</sub> P | C <sub>54</sub> H <sub>80</sub> Ge <sub>2</sub> N <sub>4</sub> P <sub>2</sub> |
| Fw                                                            | 531.62                                               | 447.46                                               | 992.34                                                                        |
| T/K                                                           | 100(2)                                               | 100(2)                                               | 100(2)                                                                        |
| cryst system                                                  | orthorhombic                                         | monoclinic                                           | monoclinic                                                                    |
| space group                                                   | <i>P n a</i> 21                                      | <i>P</i> 1 21/ <i>c</i> 1                            | <i>P</i> 1 21/ <i>c</i> 1                                                     |
| <i>a</i> (Å)                                                  | 15.8519(13)                                          | 14.931(2)                                            | 16.8440(6)                                                                    |
| <i>b</i> (Å)                                                  | 10.8312(8)                                           | 9.1937(13)                                           | 12.6688(6)                                                                    |
| <i>c</i> (Å)                                                  | 16.0462(12)                                          | 16.339(2)                                            | 25.5968(13)                                                                   |
| <i>α</i> (deg)                                                | 90                                                   | 90                                                   | 90                                                                            |
| <i>β</i> (deg)                                                | 90                                                   | 107.054(5)                                           | 103.500(4)                                                                    |
| <i>γ</i> (deg)                                                | 90                                                   | 90                                                   | 90                                                                            |
| <i>V</i> (Å <sup>3</sup> )                                    | 2755.1(4)                                            | 2144.3(5)                                            | 5311.3(4)                                                                     |
| <i>Z</i>                                                      | 4                                                    | 4                                                    | 4                                                                             |
| <i>d</i> <sub>calcd</sub> (g cm <sup>-3</sup> )               | 1.282                                                | 1.386                                                | 1.241                                                                         |
| <i>μ</i> (mm <sup>-1</sup> )                                  | 1.284                                                | 1.635                                                | 2.240                                                                         |
| <i>F</i> (000)                                                | 1120                                                 | 928                                                  | 2104                                                                          |
| cryst size (mm)                                               | 0.12 x 0.22 x 0.24                                   | 0.02 x 0.16 x 0.20                                   | 0.01 x 0.04 x 0.10                                                            |
| 2 <i>θ</i> range (deg)                                        | 5.139 < 2 <i>θ</i> < 56.21                           | 5.141 < 2 <i>θ</i> < 55.31                           | 7.855 < 2 <i>θ</i> < 132.9                                                    |
| index range                                                   | -                                                    | -                                                    | -19 ≤ <i>h</i> ≤ 20,<br>-14 ≤ <i>k</i> ≤ 15,<br>-30 ≤ <i>l</i> ≤ 27           |
| no. of rflns collected                                        | 8578                                                 | 6529                                                 | 19270                                                                         |
| no. of indep rflns                                            | 8578                                                 | 6529                                                 | 9112                                                                          |
| <i>R</i> 1, <i>wR</i> 2 ( <i>I</i> > 2 <i>σ</i> ( <i>I</i> )) | 0.0891/0.2074                                        | 0.0594/0.1148                                        | 0.0888/0.2180                                                                 |
| <i>R</i> 1, <i>wR</i> 2 (all data)                            | 0.1342/0.2518                                        | 0.1112/0.1359                                        | 0.1434/0.2473                                                                 |
| goodness of fit, <i>F</i> <sup>2</sup>                        | 0.993                                                | 1.013                                                | 1.076                                                                         |
| no. of data/restraints/params                                 | 8578 / 1 / 300                                       | 6529 / 0 / 242                                       | 9112 / 0 / 579                                                                |
| largest diff peak and hole, e <sup>+</sup> Å <sup>-3</sup>    | 1.278 and -1.638                                     | 0.764 and -1.232                                     | 2.064 and -1.161                                                              |

**Table S6.** X-Ray data for compounds **5**, **6** and **8**.

|                                                               | <b>5</b>                                                                      | <b>6</b>                                                                                     | <b>8</b>                                                                         |
|---------------------------------------------------------------|-------------------------------------------------------------------------------|----------------------------------------------------------------------------------------------|----------------------------------------------------------------------------------|
| Formula                                                       | C <sub>42</sub> H <sub>56</sub> Ge <sub>2</sub> N <sub>4</sub> P <sub>2</sub> | C <sub>55</sub> H <sub>80</sub> Ge <sub>2</sub> N <sub>4</sub> O <sub>2</sub> P <sub>2</sub> | C <sub>64.75</sub> H <sub>76</sub> Ge <sub>2</sub> N <sub>4</sub> P <sub>2</sub> |
| Fw                                                            | 824.02                                                                        | 1036.35                                                                                      | 1117.41                                                                          |
| T/K                                                           | 100(2)                                                                        | 100(2)                                                                                       | 100(2)                                                                           |
| cryst system                                                  | triclinic                                                                     | monoclinic                                                                                   | triclinic                                                                        |
| space group                                                   | <i>P</i> -1                                                                   | <i>P</i> 1 <i>n</i> 1                                                                        | <i>P</i> -1                                                                      |
| <i>a</i> (Å)                                                  | 9.0774(3)                                                                     | 13.5796(14)                                                                                  | 12.3583(8)                                                                       |
| <i>b</i> (Å)                                                  | 10.8130(3)                                                                    | 13.6534(15)                                                                                  | 19.8949(11)                                                                      |
| <i>c</i> (Å)                                                  | 12.0946(3)                                                                    | 15.0168(17)                                                                                  | 24.9120(16)                                                                      |
| $\alpha$ (deg)                                                | 66.6525(11)                                                                   | 90                                                                                           | 102.273(3)                                                                       |
| $\beta$ (deg)                                                 | 72.9065(10)                                                                   | 94.063(6)                                                                                    | 98.169(4)                                                                        |
| $\gamma$ (deg)                                                | 80.3782(11)                                                                   | 90                                                                                           | 89.971(3)                                                                        |
| <i>V</i> (Å <sup>3</sup> )                                    | 1040.04(5)                                                                    | 2777.2(5)                                                                                    | 5921.5(6)                                                                        |
| <i>Z</i>                                                      | 1                                                                             | 2                                                                                            | 4                                                                                |
| <i>d</i> <sub>calcd</sub> (g cm <sup>-3</sup> )               | 1.316                                                                         | 1.239                                                                                        | 1.253                                                                            |
| $\mu$ (mm <sup>-1</sup> )                                     | 1.555                                                                         | 2.192                                                                                        | 1.111                                                                            |
| <i>F</i> (000)                                                | 430                                                                           | 1096                                                                                         | 2346                                                                             |
| cryst size (mm)                                               | 0.14 x 0.20 x 0.24                                                            | 0.10 x 0.12 x 0.20                                                                           | 0.04 x 0.20 x 0.24                                                               |
| 2 $\theta$ range (deg)                                        | 5.245 < 2 $\theta$ < 60.69                                                    | 8.485 < 2 $\theta$ < 135.6                                                                   | 4.389 < 2 $\theta$ < 52.03                                                       |
| index range                                                   | -13 ≤ <i>h</i> ≤ 13,<br>-13 ≤ <i>k</i> ≤ 16,<br>-15 ≤ <i>l</i> ≤ 18           | -16 ≤ <i>h</i> ≤ 16,<br>-16 ≤ <i>k</i> ≤ 16,<br>-17 ≤ <i>l</i> ≤ 17                          | -                                                                                |
| no. of rflns collected                                        | 29235                                                                         | 33072                                                                                        | 25276                                                                            |
| no. of indep rflns                                            | 7538                                                                          | 9654                                                                                         | 25276                                                                            |
| <i>R</i> 1, <i>wR</i> 2 ( <i>I</i> > 2 $\sigma$ ( <i>I</i> )) | 0.0499/0.0881                                                                 | 0.0582/0.1489                                                                                | 0.0921/0.1906                                                                    |
| <i>R</i> 1, <i>wR</i> 2 (all data)                            | 0.0877/0.1031                                                                 | 0.0643/0.1575                                                                                | 0.1420/0.2150                                                                    |
| goodness of fit, <i>F</i> <sup>2</sup>                        | 1.050                                                                         | 1.030                                                                                        | 1.060                                                                            |
| no. of data/restraints/params                                 | 7538 / 0 / 232                                                                | 9654 / 141 / 586                                                                             | 25276 / 2229 / 1242                                                              |
| largest diff peak and hole, eÅ <sup>-3</sup>                  | 1.467 and -0.710                                                              | 0.755 and -0.768                                                                             | 1.569 and -1.780                                                                 |

## S7. Theoretical Studies

All geometry optimization and MO analysis were computed using the B3LYP-D3(BJ) functional with def2-TZVPP basis set as implemented in the Gaussian 09 package of programs.<sup>6</sup> The potential energy was refined by single point calculation with larger basis sets (def2-TZVPP). The vibrational frequency calculations were performed to establish the nature of stationary points. The local minima were confirmed by zero imaginary frequencies, and transition states were characterized by an imaginary frequency. In the free energy profile, the Gibbs free energy ( $\Delta G$ ) was calculated at 298.15 K and 1 atm.

List of colour coded atom used in optimised structures

| Abbreviation | Definition |
|--------------|------------|
| Grey         | Carbon     |
| Blue         | Nitrogen   |
| Orange       | Phosphorus |
| Red          | Oxygen     |
| Green        | Germanium  |

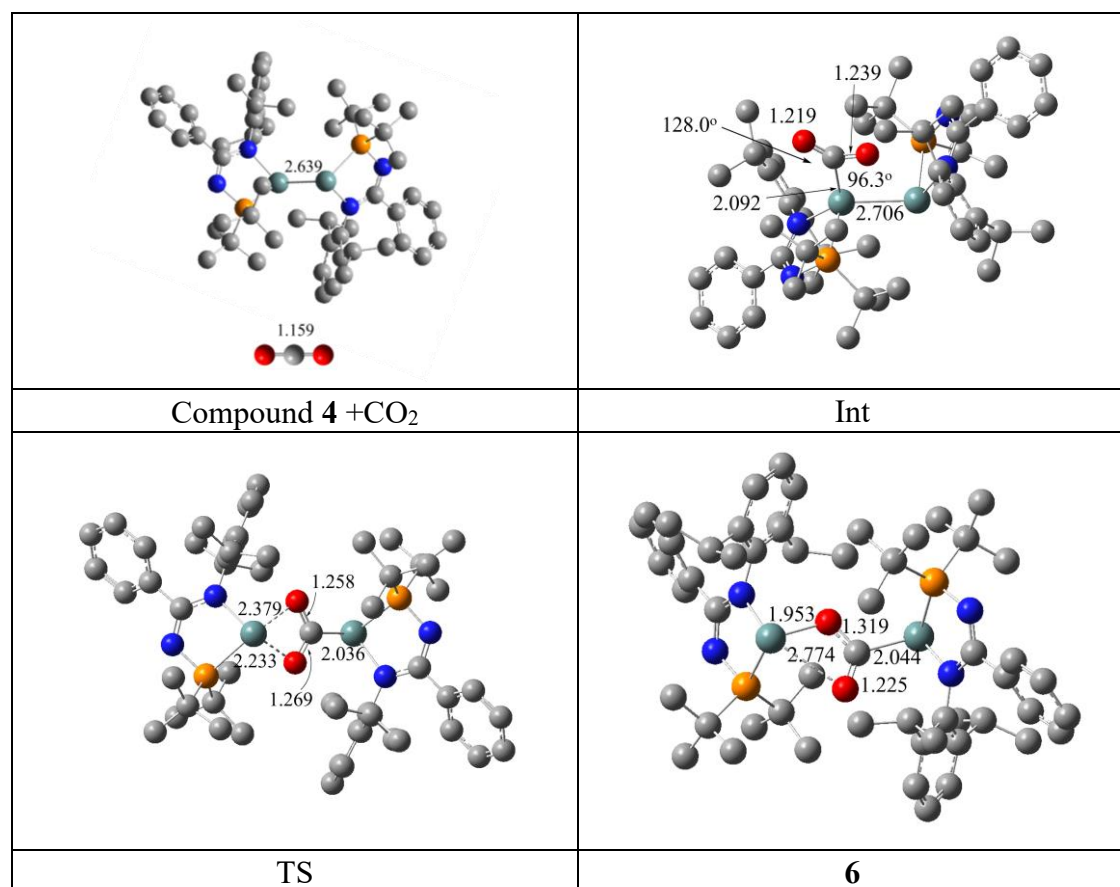

**Figure S42.** Optimised geometries of the minimal and transition states at (B3LYP-



D3(BJ)/ def2-TZVPP). Hydrogen atoms are omitted for clarity. The bond lengths displayed are measured in Angstroms (Å).

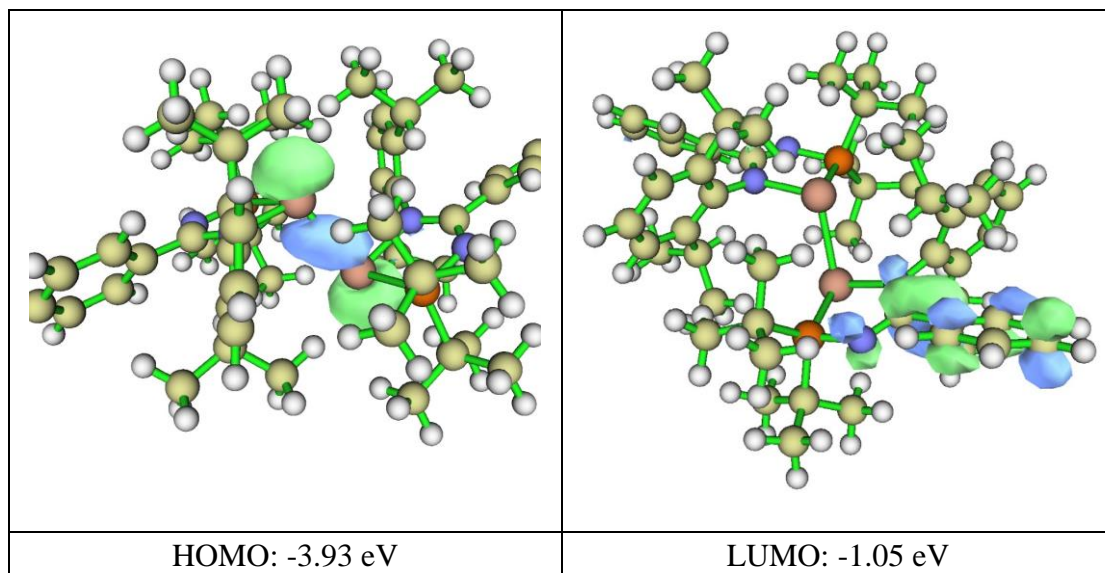

**Figure S43.** HOMO and LUMO of compound 4.

---

**Table S7****B3LYP-D3(BJ)/def2-TZVPP****Compound 4**

Sum of electronic and thermal Free Energies = -7163.189334 Hartree

---

| Atomic<br>Number | Coordinates (Angstroms) |            |            |
|------------------|-------------------------|------------|------------|
|                  | X                       | Y          | Z          |
| C                | 3.50979100              | 7.28081000 | 6.66780500 |
| C                | 4.88364100              | 7.46026400 | 6.94607200 |
| C                | 5.68468500              | 8.02287900 | 5.95625500 |
| H                | 6.73894000              | 8.16334500 | 6.14125900 |
| C                | 5.16171500              | 8.40021300 | 4.72787200 |
| H                | 5.80757200              | 8.82779200 | 3.97254800 |
| C                | 3.81078100              | 8.23887300 | 4.47853600 |
| H                | 3.40569900              | 8.54843100 | 3.52541600 |
| C                | 2.96317300              | 7.68773700 | 5.43625400 |
| C                | 1.47971800              | 7.55927800 | 5.13754300 |
| H                | 1.05557600              | 6.84909600 | 5.83763200 |
| C                | 0.76609500              | 8.89007200 | 5.38500400 |
| H                | 0.92383800              | 9.22535600 | 6.40900200 |
| H                | -0.30877300             | 8.78952100 | 5.22692500 |
| H                | 1.13727400              | 9.66716500 | 4.71549600 |
| C                | 1.19522300              | 7.02270900 | 3.73280700 |
| H                | 1.48186100              | 7.73523500 | 2.95815100 |
| H                | 0.12750300              | 6.83021000 | 3.61838600 |
| H                | 1.72857200              | 6.09032300 | 3.55389500 |
| C                | 5.49373700              | 7.01811200 | 8.27052800 |
| H                | 4.80968100              | 7.33545100 | 9.05989100 |
| C                | 5.60998800              | 5.49189100 | 8.38930400 |
| H                | 4.64441000              | 5.00119000 | 8.30607100 |
| H                | 6.03211100              | 5.22819000 | 9.36008900 |
| H                | 6.26950500              | 5.08991000 | 7.61757100 |
| C                | 6.84719600              | 7.65824600 | 8.57881900 |
| H                | 7.63431800              | 7.28977000 | 7.91813200 |
| H                | 7.13922700              | 7.40943500 | 9.59944500 |
| H                | 6.81465400              | 8.74344900 | 8.49565300 |
| C                | 2.11253900              | 5.44828800 | 7.41227000 |
| C                | 2.41344100              | 4.63557200 | 6.18762200 |
| C                | 3.66425900              | 4.55813800 | 5.57313500 |
| H                | 4.50377100              | 5.09848700 | 5.97131300 |
| C                | 3.84778300              | 3.78045900 | 4.43696600 |
| H                | 4.82759300              | 3.73161700 | 3.98158600 |

---

---

|   |             |             |             |
|---|-------------|-------------|-------------|
| C | 2.78555800  | 3.07739700  | 3.88462900  |
| H | 2.92994200  | 2.48234100  | 2.99291000  |
| C | 1.53570300  | 3.14269400  | 4.49056100  |
| H | 0.69951200  | 2.59813900  | 4.07294100  |
| C | 1.35670700  | 3.90465800  | 5.63412900  |
| H | 0.39321300  | 3.94869200  | 6.11769200  |
| C | 1.01911700  | 4.75298600  | 11.04292100 |
| C | 2.47110200  | 4.26332600  | 10.91987500 |
| H | 2.73055100  | 3.71112300  | 11.82570300 |
| H | 3.16769200  | 5.09427400  | 10.81707500 |
| H | 2.59348400  | 3.60578600  | 10.06143100 |
| C | 0.10448900  | 3.53293500  | 11.17233300 |
| H | 0.09995900  | 2.93364400  | 10.26315500 |
| H | -0.91813300 | 3.81376000  | 11.41457800 |
| H | 0.47096200  | 2.90477100  | 11.98761800 |
| C | 0.89308900  | 5.64982100  | 12.27813200 |
| H | -0.12185700 | 6.00706400  | 12.43432300 |
| H | 1.54581700  | 6.51780600  | 12.21302600 |
| H | 1.18524700  | 5.08695600  | 13.16691700 |
| C | -1.14771300 | 6.00068100  | 9.15449700  |
| C | -1.84158200 | 4.67156400  | 8.82950300  |
| H | -2.01913500 | 4.06511100  | 9.71176400  |
| H | -1.25658600 | 4.08805900  | 8.12067500  |
| C | -1.83404700 | 6.71696300  | 10.31519800 |
| H | -2.85114200 | 6.99352100  | 10.02860300 |
| H | -1.30789900 | 7.63138000  | 10.58089700 |
| H | -1.89976200 | 6.08709500  | 11.20087700 |
| C | -1.20842200 | 6.88093800  | 7.89686300  |
| H | -0.73751100 | 6.38603800  | 7.04959000  |
| H | -0.73084400 | 7.84610600  | 8.04937700  |
| C | 1.33376200  | 9.58085300  | 12.38666600 |
| C | 2.45372000  | 9.04192000  | 13.05477200 |
| C | 2.24242300  | 8.33304300  | 14.23764800 |
| H | 3.09414400  | 7.92646100  | 14.76509000 |
| C | 0.97429900  | 8.13892400  | 14.74816700 |
| H | 0.83444400  | 7.58669500  | 15.66786800 |
| C | -0.12285800 | 8.64594300  | 14.06710800 |
| H | -1.10996100 | 8.48223200  | 14.47160800 |
| C | 0.02536700  | 9.36908400  | 12.88801500 |
| C | -1.20137000 | 9.96380000  | 12.20569000 |
| H | -1.08411600 | 9.80205400  | 11.13179800 |
| C | -1.31791600 | 11.48278200 | 12.40198100 |
| H | -2.20516300 | 11.85335900 | 11.88636400 |

---

|    |             |             |             |
|----|-------------|-------------|-------------|
| H  | -0.46003400 | 12.01650500 | 12.00562600 |
| H  | -1.41871000 | 11.73097500 | 13.46023300 |
| C  | -2.51902800 | 9.30766200  | 12.62320400 |
| H  | -2.47861000 | 8.22179600  | 12.56129400 |
| H  | -2.79844200 | 9.57748300  | 13.64339100 |
| C  | 3.89060600  | 9.22175800  | 12.58706800 |
| H  | 3.87035800  | 9.75324200  | 11.63749700 |
| C  | 4.59452200  | 7.87763600  | 12.35405200 |
| H  | 4.69527900  | 7.31936500  | 13.28587800 |
| H  | 5.59882000  | 8.04927100  | 11.96194800 |
| H  | 4.05323400  | 7.26599900  | 11.63636400 |
| C  | 4.71730100  | 10.04051200 | 13.59159300 |
| H  | 4.24972000  | 10.98562200 | 13.84397100 |
| H  | 5.70614100  | 10.24767500 | 13.17923800 |
| H  | 4.85764400  | 9.47828200  | 14.51626000 |
| C  | 2.06027600  | 11.59565000 | 11.23332200 |
| C  | 3.58733900  | 11.26666000 | 6.34619800  |
| H  | 4.58764900  | 11.16331600 | 5.92337900  |
| H  | 3.05641700  | 12.01801900 | 5.76324800  |
| H  | 3.08857400  | 10.30966600 | 6.21849100  |
| C  | 4.51643800  | 10.60429900 | 8.57344500  |
| H  | 5.51117700  | 10.55080100 | 8.13032400  |
| H  | 4.06761400  | 9.61694800  | 8.50991300  |
| H  | 4.62239000  | 10.86549300 | 9.62559400  |
| Ge | 2.34936000  | 7.55203000  | 9.47854200  |
| Ge | 0.77209400  | 9.66653100  | 9.37979100  |
| N  | 2.66827800  | 6.66027000  | 7.63431100  |
| N  | 1.23214200  | 4.90392700  | 8.22213400  |
| N  | 1.49691100  | 10.37120300 | 11.20882100 |
| N  | 2.31766500  | 12.28273500 | 10.14209200 |
| P  | 0.68996100  | 5.79123000  | 9.51624700  |
| P  | 2.01053800  | 11.62243400 | 8.65565900  |
| H  | -2.25525700 | 7.06172500  | 7.64392800  |
| H  | -2.81233600 | 4.88563700  | 8.37571500  |
| C  | 2.45936300  | 12.29775400 | 12.49796600 |
| C  | 1.80421500  | 12.16595500 | 13.72394000 |
| C  | 3.55318800  | 13.16795100 | 12.42431600 |
| C  | 2.23738100  | 12.87238200 | 14.83866900 |
| H  | 0.95728200  | 11.51366300 | 13.82739000 |
| C  | 3.99538200  | 13.85945300 | 13.54016900 |
| H  | 4.05147700  | 13.28464300 | 11.47518900 |
| C  | 3.33825700  | 13.71391300 | 14.75708800 |
| H  | 1.71131600  | 12.75445800 | 15.77625000 |

---

|   |             |             |             |
|---|-------------|-------------|-------------|
| H | 4.85387400  | 14.51268700 | 13.46039200 |
| H | 3.67999400  | 14.25229800 | 15.63082400 |
| C | 3.69431600  | 11.65629000 | 7.81809800  |
| C | 4.39938500  | 13.01010100 | 7.97832000  |
| H | 5.45306000  | 12.88368200 | 7.71841600  |
| H | 3.99030700  | 13.77378600 | 7.32465300  |
| H | 4.34100000  | 13.36511900 | 9.00501800  |
| H | -3.31910800 | 9.65208500  | 11.96739800 |
| C | -0.31907700 | 13.05043100 | 8.90580800  |
| C | 0.76751300  | 12.78596600 | 7.85141700  |
| H | -0.78538400 | 12.12463500 | 9.24058400  |
| H | 0.09047800  | 13.56336200 | 9.77327500  |
| H | -1.09185800 | 13.68031500 | 8.45953300  |
| C | 1.38261900  | 14.12677300 | 7.44226300  |
| C | 0.12742900  | 12.10381500 | 6.63873800  |
| H | 2.06082200  | 14.02569800 | 6.59770900  |
| H | 0.58015300  | 14.80271600 | 7.13760200  |
| H | 1.91630400  | 14.59126300 | 8.26970900  |
| H | -0.63520500 | 12.76310700 | 6.21830300  |
| H | 0.84938100  | 11.88883500 | 5.85424000  |
| H | -0.35953200 | 11.17142200 | 6.92225000  |

---

**Table S8****B3LYP-D3(BJ)/def2-TZVPP**CO<sub>2</sub>

Sum of electronic and thermal Free Energies = -188.6715805 Hartree

---

| Atomic<br>Number | Coordinates (Angstroms) |             |             |
|------------------|-------------------------|-------------|-------------|
|                  | X                       | Y           | Z           |
| C                | 0.00000000              | 0.00000300  | -0.00000500 |
| O                | 1.15982400              | -0.00000100 | 0.00000200  |
| O                | -1.15982400             | -0.00000100 | 0.00000200  |

---

**Table S9****B3LYP-D3(BJ)/def2-TZVPP**

Int

Sum of electronic and thermal Free Energies = -7351.86604375 Hartree

---

| Atomic<br>Number |             | Coordinates (Angstroms) |             |   |
|------------------|-------------|-------------------------|-------------|---|
|                  |             | X                       | Y           | Z |
| C                | -3.37946900 | 1.47156300              | 0.32679200  |   |
| C                | -3.59320500 | 2.31938100              | -0.78292900 |   |
| C                | -3.96667200 | 3.64842400              | -0.54502500 |   |
| H                | -4.13823500 | 4.31805200              | -1.39008000 |   |
| C                | -4.12475100 | 4.12671800              | 0.75355500  |   |
| H                | -4.41917100 | 5.16548500              | 0.92207100  |   |
| C                | -3.90337300 | 3.27963900              | 1.83979600  |   |
| H                | -4.02966600 | 3.66564200              | 2.85172000  |   |
| C                | -3.52689500 | 1.94298100              | 1.65631300  |   |
| C                | -3.32492800 | 1.01454100              | 2.84612900  |   |
| H                | -2.46910000 | 0.36572100              | 2.63036400  |   |
| C                | -2.97776000 | 1.74061900              | 4.14808700  |   |
| H                | -2.17043700 | 2.47282000              | 4.00192100  |   |
| H                | -2.62768300 | 1.00491600              | 4.88659400  |   |
| H                | -3.84510000 | 2.26908600              | 4.57810900  |   |
| C                | -4.51920400 | 0.07258300              | 3.07320900  |   |
| H                | -5.44369100 | 0.63711700              | 3.28145400  |   |
| H                | -4.31494500 | -0.57801900             | 3.93759300  |   |
| H                | -4.70301200 | -0.58060200             | 2.21004200  |   |

---

---

|   |             |             |             |
|---|-------------|-------------|-------------|
| C | -3.40517200 | 1.82088600  | -2.20831900 |
| H | -3.40477400 | 0.72587300  | -2.18544200 |
| C | -4.54539000 | 2.23990400  | -3.14330600 |
| H | -5.51971400 | 1.92888500  | -2.73766900 |
| H | -4.42029100 | 1.76806200  | -4.13084800 |
| H | -4.57120100 | 3.32972700  | -3.30266000 |
| C | -2.03172300 | 2.24467500  | -2.74151200 |
| H | -1.94132600 | 3.34132800  | -2.78578200 |
| H | -1.85450200 | 1.84398500  | -3.75260300 |
| H | -1.22911000 | 1.87088000  | -2.08732000 |
| C | -3.82914100 | -0.82907000 | -0.39786300 |
| C | -5.25513400 | -0.51857800 | -0.76584300 |
| C | -6.08483600 | 0.38050800  | -0.07551100 |
| H | -5.72469700 | 0.90334400  | 0.80397400  |
| C | -7.39458400 | 0.60972700  | -0.50274900 |
| H | -8.02350400 | 1.30689100  | 0.05545300  |
| C | -7.89656500 | -0.03949200 | -1.63227300 |
| H | -8.91849200 | 0.15131700  | -1.96875700 |
| C | -7.08167000 | -0.93940200 | -2.32576800 |
| H | -7.46271900 | -1.45761200 | -3.20894000 |
| C | -5.78054600 | -1.18296600 | -1.88976600 |
| H | -5.14266800 | -1.89275500 | -2.41544500 |
| C | -1.23559300 | -2.92007200 | -2.17182500 |
| C | -1.33452000 | -1.62582500 | -3.00176800 |
| H | -1.01737000 | -1.83829000 | -4.03534800 |
| H | -0.68538200 | -0.82823300 | -2.61556400 |
| H | -2.36845100 | -1.25243800 | -3.03356600 |
| C | -2.16024900 | -3.96756200 | -2.81209900 |
| H | -3.21510300 | -3.67302300 | -2.72091300 |
| H | -2.03735800 | -4.96286700 | -2.36992900 |
| H | -1.91327500 | -4.04800100 | -3.88367500 |
| C | 0.21173800  | -3.41772700 | -2.11053600 |
| H | 0.28526600  | -4.40473400 | -1.63436200 |
| H | 0.87165600  | -2.73127500 | -1.56136300 |
| H | 0.61543500  | -3.51178700 | -3.13036200 |
| C | -1.78437000 | -3.83839000 | 0.81831300  |
| C | -2.45098300 | -5.11226200 | 0.28152500  |
| H | -1.83836700 | -5.61246100 | -0.48052900 |
| H | -3.44488500 | -4.90127400 | -0.13922900 |
| C | -0.32967000 | -4.10905300 | 1.23502900  |
| H | -0.32416200 | -4.76025400 | 2.12390600  |
| H | 0.21271000  | -3.19040100 | 1.49423400  |
| H | 0.23988200  | -4.61927200 | 0.44673600  |

---

|    |             |             |             |
|----|-------------|-------------|-------------|
| C  | -2.60377500 | -3.31714500 | 2.01572700  |
| H  | -3.64259800 | -3.11156600 | 1.72113300  |
| H  | -2.17269200 | -2.41501000 | 2.46879700  |
| C  | 3.33255500  | -1.48081400 | -0.19920100 |
| C  | 3.53934300  | -1.98677500 | -1.51597000 |
| C  | 3.70986800  | -3.36359900 | -1.70500200 |
| H  | 3.84671300  | -3.75000500 | -2.71752500 |
| C  | 3.72423300  | -4.24118200 | -0.62675600 |
| H  | 3.84152800  | -5.31583000 | -0.78654800 |
| C  | 3.63855000  | -3.72663400 | 0.66322800  |
| H  | 3.71794300  | -4.40807800 | 1.51178100  |
| C  | 3.46734000  | -2.35814000 | 0.91926100  |
| C  | 3.57176300  | -1.92028200 | 2.37895600  |
| H  | 3.25287900  | -0.87513100 | 2.44763600  |
| C  | 5.03323300  | -2.04394200 | 2.85597800  |
| H  | 5.14295100  | -1.60348600 | 3.85961700  |
| H  | 5.74377700  | -1.54776200 | 2.18773100  |
| H  | 5.32604100  | -3.10470300 | 2.92318400  |
| C  | 2.68800200  | -2.72974200 | 3.34140100  |
| H  | 1.63813500  | -2.72114200 | 3.03817300  |
| H  | 3.03385500  | -3.77271200 | 3.42966000  |
| C  | 3.70106500  | -1.08223200 | -2.73772600 |
| H  | 3.59150800  | -0.04479400 | -2.39616300 |
| C  | 2.65323200  | -1.32852700 | -3.83177600 |
| H  | 2.71703600  | -2.35735000 | -4.22139500 |
| H  | 2.81529400  | -0.64197700 | -4.67859500 |
| H  | 1.63504000  | -1.16461300 | -3.45761400 |
| C  | 5.11119700  | -1.22083700 | -3.34236900 |
| H  | 5.90261400  | -1.06248100 | -2.59590200 |
| H  | 5.25577000  | -0.48424800 | -4.14922900 |
| H  | 5.26427100  | -2.22229200 | -3.77436500 |
| C  | 3.61824100  | 0.87190400  | 0.53267700  |
| C  | 1.07321300  | 3.88298000  | -2.40037100 |
| H  | 1.39773800  | 4.50485700  | -3.25133800 |
| H  | 0.23207100  | 4.39461500  | -1.91471600 |
| H  | 0.70675400  | 2.92959700  | -2.80729500 |
| C  | 3.36293500  | 2.89723100  | -2.20425600 |
| H  | 3.68575700  | 3.49729200  | -3.07067200 |
| H  | 2.99938300  | 1.93249600  | -2.58777600 |
| H  | 4.23629900  | 2.71450500  | -1.56357700 |
| Ge | -1.02796600 | -0.34497500 | 0.42246400  |
| Ge | 1.13276900  | 0.40389100  | -1.02426400 |
| N  | -2.99347100 | 0.11477800  | 0.11284900  |



---

|   |             |             |             |
|---|-------------|-------------|-------------|
| N | -3.43725000 | -2.05618300 | -0.67062600 |
| N | 2.91638400  | -0.11258000 | -0.07234900 |
| N | 3.16696200  | 2.09865200  | 0.71703000  |
| P | -1.82120600 | -2.44665500 | -0.44465600 |
| P | 1.72694500  | 2.55079300  | -0.00553000 |
| H | -2.61469200 | -4.09902700 | 2.79255000  |
| H | -2.57790400 | -5.82074100 | 1.11655900  |
| C | 5.03499300  | 0.67985100  | 0.97704900  |
| C | 5.97607400  | 0.01994200  | 0.17711800  |
| C | 5.45690500  | 1.27207500  | 2.17791400  |
| C | 7.31386300  | -0.05573700 | 0.57270700  |
| H | 5.66553200  | -0.43277300 | -0.75983200 |
| C | 6.78647400  | 1.17590800  | 2.58392700  |
| H | 4.72347200  | 1.80261800  | 2.78570300  |
| C | 7.72169800  | 0.51308700  | 1.78099300  |
| H | 8.03681600  | -0.56905100 | -0.06566900 |
| H | 7.09823300  | 1.62391200  | 3.53041300  |
| H | 8.76515000  | 0.44249200  | 2.09726200  |
| C | 2.25973900  | 3.66307100  | -1.45287900 |
| C | 2.83400700  | 5.00236200  | -0.97598700 |
| H | 3.28026200  | 5.52701100  | -1.83743800 |
| H | 2.06054000  | 5.66061900  | -0.55777300 |
| H | 3.62160200  | 4.85363800  | -0.22371400 |
| H | 2.74260000  | -2.28573100 | 4.34781900  |
| C | 0.32977600  | 2.41825000  | 2.33739400  |
| C | 0.78931500  | 3.48957800  | 1.33863500  |
| H | 1.14424600  | 1.74347600  | 2.63383900  |
| H | -0.06062500 | 2.91125400  | 3.24068800  |
| H | -0.48095700 | 1.80950600  | 1.92148000  |
| C | -0.43325400 | 4.20761800  | 0.75710900  |
| C | 1.72741200  | 4.46313800  | 2.07203900  |
| H | -0.15517800 | 5.05950500  | 0.11979100  |
| H | -1.07489300 | 3.52695700  | 0.17692000  |
| H | -1.05150100 | 4.59737700  | 1.58087500  |
| H | 2.64844500  | 3.95467800  | 2.38842200  |
| H | 2.00066100  | 5.33272900  | 1.46457600  |
| H | 1.20746900  | 4.83450400  | 2.97036800  |
| C | -0.22938500 | -0.73977100 | 2.31607500  |
| O | 0.94814100  | -0.85487500 | 1.94640300  |
| O | -0.82041200 | -0.81889900 | 3.37931800  |

---

**Table S10****B3LYP-D3(BJ)/def2-TZVPP**

TS

Sum of electronic and thermal Free Energies = -7351.85820575 Hartree

---

| Atomic<br>Number | Coordinates (Angstroms) |             |             |
|------------------|-------------------------|-------------|-------------|
|                  | X                       | Y           | Z           |
| C                | -3.47275800             | 1.61584900  | 0.22916700  |
| C                | -3.37554400             | 2.16650800  | -1.06401800 |
| C                | -3.36990300             | 3.55130300  | -1.20113900 |
| H                | -3.29501700             | 3.98092600  | -2.19091500 |
| C                | -3.44132200             | 4.38930200  | -0.10112000 |
| H                | -3.42594400             | 5.46336100  | -0.23009500 |
| C                | -3.53298400             | 3.83821500  | 1.16524300  |
| H                | -3.59301000             | 4.49125200  | 2.02547300  |
| C                | -3.55477200             | 2.45878700  | 1.35490600  |
| C                | -3.68102800             | 1.92857100  | 2.77366000  |
| H                | -3.72354200             | 0.84153700  | 2.72325600  |
| C                | -2.46137400             | 2.31150700  | 3.62162800  |
| H                | -2.39939600             | 3.39365200  | 3.74811700  |
| H                | -1.53775800             | 1.97411200  | 3.15401000  |
| H                | -2.52625200             | 1.85993400  | 4.61309400  |
| C                | -4.97518600             | 2.39794800  | 3.45189000  |
| H                | -5.05545700             | 1.96757800  | 4.45152400  |
| H                | -5.85746300             | 2.09764400  | 2.88678000  |
| H                | -4.99968600             | 3.48351400  | 3.55428200  |
| C                | -3.26028600             | 1.32079100  | -2.31804700 |
| H                | -3.28978500             | 0.27601000  | -2.02493300 |
| C                | -4.43095400             | 1.57232700  | -3.27784300 |
| H                | -5.39085400             | 1.44526000  | -2.78255600 |
| H                | -4.38659000             | 0.87833200  | -4.11903600 |
| H                | -4.39170600             | 2.58489300  | -3.68243300 |
| C                | -1.92200900             | 1.54790300  | -3.03195300 |
| H                | -1.82380900             | 0.86742600  | -3.87953300 |
| H                | -1.08847200             | 1.38307900  | -2.35543300 |
| H                | -1.84888000             | 2.56752200  | -3.41401000 |
| C                | -4.29908000             | -0.68281300 | -0.04269800 |
| C                | -5.63749100             | -0.23860600 | -0.53547300 |
| C                | -6.33118700             | 0.83666500  | 0.01835700  |
| H                | -5.89933400             | 1.39817600  | 0.82835300  |
| C                | -7.58137300             | 1.19465200  | -0.46839600 |
| H                | -8.10729100             | 2.02896400  | -0.02454400 |

---

---

|   |             |             |             |
|---|-------------|-------------|-------------|
| C | -8.15047900 | 0.49096000  | -1.52221200 |
| H | -9.11881200 | 0.77933100  | -1.90856600 |
| C | -7.46980800 | -0.58911000 | -2.07447600 |
| H | -7.90667000 | -1.14479000 | -2.89321900 |
| C | -6.22937600 | -0.95650400 | -1.57738100 |
| H | -5.69694600 | -1.80023700 | -1.98884000 |
| C | -2.92691700 | -3.72378500 | 1.79979200  |
| C | -3.86138500 | -2.96601100 | 2.75818300  |
| H | -4.81817400 | -2.74954300 | 2.28783000  |
| H | -3.42347600 | -2.02591900 | 3.09718600  |
| H | -4.03607800 | -3.58377200 | 3.64140100  |
| C | -1.60058200 | -4.01398800 | 2.51666500  |
| H | -1.11528800 | -3.09758900 | 2.85295700  |
| H | -0.89760200 | -4.55155400 | 1.88460500  |
| H | -1.79654100 | -4.62902400 | 3.39777900  |
| C | -3.60658000 | -5.02906000 | 1.37992000  |
| H | -3.92088200 | -5.57096300 | 2.27519900  |
| H | -2.93062100 | -5.67750700 | 0.82687500  |
| H | -4.49019200 | -4.84227400 | 0.77139400  |
| C | -1.87331400 | -3.35676400 | -1.14328900 |
| C | -2.83912600 | -4.37327100 | -1.76625200 |
| H | -2.47580000 | -4.63088700 | -2.76383400 |
| H | -3.84007100 | -3.95627100 | -1.86639000 |
| H | -2.90272400 | -5.29308700 | -1.19276000 |
| C | -0.51995700 | -3.99846900 | -0.82537300 |
| H | -0.62729400 | -4.88426500 | -0.20063800 |
| H | 0.15658200  | -3.30006900 | -0.33784200 |
| H | -0.04809800 | -4.31415900 | -1.75788900 |
| C | -1.67584700 | -2.21197100 | -2.15173900 |
| H | -1.01155200 | -1.44443600 | -1.76919400 |
| H | -2.62707700 | -1.75693600 | -2.42095400 |
| H | -1.22989100 | -2.62253100 | -3.05963100 |
| C | 0.30570800  | 0.26451900  | -0.17945900 |
| O | -0.59732800 | 1.11381900  | 0.03501800  |
| O | 0.15174500  | -0.92412300 | 0.23953900  |
| C | 3.32833700  | -1.61406200 | -0.43936400 |
| C | 3.33996600  | -2.35855400 | -1.63745100 |
| C | 3.20126000  | -3.74228300 | -1.57245000 |
| H | 3.20712500  | -4.31664100 | -2.48897100 |
| C | 3.06736200  | -4.39696900 | -0.36068700 |
| H | 2.96046000  | -5.47300900 | -0.32890900 |
| C | 3.07285300  | -3.65937100 | 0.81030200  |
| H | 2.97211500  | -4.17003300 | 1.75828600  |

---

|   |            |             |             |
|---|------------|-------------|-------------|
| C | 3.19597500 | -2.27242600 | 0.80172200  |
| C | 3.19871400 | -1.55274300 | 2.13812400  |
| H | 3.29206600 | -0.48780700 | 1.94935300  |
| C | 1.88920700 | -1.76002300 | 2.90836000  |
| H | 1.03715400 | -1.44974500 | 2.31206900  |
| H | 1.90045900 | -1.17944400 | 3.83248200  |
| H | 1.75372800 | -2.80875200 | 3.17817000  |
| C | 4.39276400 | -1.98687400 | 3.00084600  |
| H | 4.45103700 | -1.37375000 | 3.90168100  |
| H | 5.33428400 | -1.89478000 | 2.46556800  |
| H | 4.28414100 | -3.02638100 | 3.31428800  |
| C | 3.53160400 | -1.71920600 | -3.00297900 |
| H | 3.66758000 | -0.64928600 | -2.85834400 |
| C | 4.78899600 | -2.24378200 | -3.70974900 |
| H | 5.68509600 | -2.08008800 | -3.11118800 |
| H | 4.92562400 | -1.73175000 | -4.66360800 |
| H | 4.71645400 | -3.31283800 | -3.91344400 |
| C | 2.29575900 | -1.91560100 | -3.88948200 |
| H | 2.13052200 | -2.97328300 | -4.10170200 |
| H | 2.42026200 | -1.39599300 | -4.84082900 |
| H | 1.40118000 | -1.52390400 | -3.40731000 |
| C | 4.32006000 | 0.58635600  | 0.05609000  |
| C | 5.62867000 | 0.01929000  | 0.49350000  |
| C | 6.27569400 | 0.60145300  | 1.58580100  |
| H | 5.80315600 | 1.43704600  | 2.07904500  |
| C | 7.49468800 | 0.11238600  | 2.02808900  |
| H | 7.97575300 | 0.56357400  | 2.88538100  |
| C | 8.09748500 | -0.95568800 | 1.37175300  |
| H | 9.04868400 | -1.33904200 | 1.71570500  |
| C | 7.47342000 | -1.52422700 | 0.26834100  |
| H | 7.93963900 | -2.34722500 | -0.25603600 |
| C | 6.24537400 | -1.04345000 | -0.16567900 |
| H | 5.76988500 | -1.49847600 | -1.01729700 |
| C | 2.02065300 | 3.24584500  | 1.45226200  |
| C | 3.02804800 | 4.13869900  | 2.19110900  |
| H | 2.67486500 | 4.28312600  | 3.21462800  |
| H | 3.12920500 | 5.11955400  | 1.73859400  |
| H | 4.01115600 | 3.67214500  | 2.23535000  |
| C | 1.76932800 | 2.01174700  | 2.33327600  |
| H | 2.69847000 | 1.48647500  | 2.54512500  |
| H | 1.06646200 | 1.31722300  | 1.88794400  |
| H | 1.34833000 | 2.34667600  | 3.28310400  |
| C | 0.70106700 | 3.98345200  | 1.20195900  |

---

|    |             |             |             |
|----|-------------|-------------|-------------|
| H  | 0.24339900  | 4.22649200  | 2.16344400  |
| H  | -0.00570700 | 3.37042900  | 0.64507600  |
| H  | 0.85762200  | 4.92117800  | 0.67072600  |
| C  | 3.12657200  | 3.93286400  | -1.40786200 |
| C  | 1.82994100  | 4.34096200  | -2.12145900 |
| H  | 1.11398300  | 4.80617500  | -1.44749600 |
| H  | 1.34546700  | 3.48492600  | -2.59148000 |
| H  | 2.06697900  | 5.06171100  | -2.90702100 |
| C  | 3.80988600  | 5.16176400  | -0.80279400 |
| H  | 4.15929300  | 5.80520700  | -1.61339000 |
| H  | 4.67244400  | 4.88541700  | -0.19830200 |
| H  | 3.12637900  | 5.74877500  | -0.19363200 |
| C  | 4.08418900  | 3.29415200  | -2.42725600 |
| H  | 4.29211200  | 4.02262800  | -3.21362000 |
| H  | 3.64791700  | 2.41254300  | -2.89672700 |
| H  | 5.02310400  | 3.00648000  | -1.95875300 |
| Ge | -1.70527600 | -0.48774500 | 1.40164200  |
| Ge | 1.82363300  | 0.76911300  | -1.44050000 |
| N  | -3.38844900 | 0.20241600  | 0.42050500  |
| N  | -4.09319400 | -1.98284500 | -0.10097200 |
| N  | 3.37009900  | -0.18754900 | -0.50700900 |
| N  | 4.18027800  | 1.88382400  | 0.24967500  |
| P  | -2.60222600 | -2.54663900 | 0.38148600  |
| P  | 2.73209000  | 2.59067100  | -0.15951200 |

---

**Table S11****B3LYP-D3(BJ)/def2-TZVPP****Compound 6**

Sum of electronic and thermal Free Energies = -7351.8680856 Hartree

---

| Atomic<br>Number | Coordinates (Angstroms) |             |             |
|------------------|-------------------------|-------------|-------------|
|                  | X                       | Y           | Z           |
| C                | 3.54029300              | -1.55621300 | 0.32198400  |
| C                | 3.38578500              | -2.12581500 | -0.95805300 |
| C                | 3.34894500              | -3.51337100 | -1.06946900 |
| H                | 3.22969200              | -3.95873600 | -2.04794400 |
| C                | 3.45306700              | -4.33277500 | 0.04199900  |
| H                | 3.41549100              | -5.40841100 | -0.06726700 |
| C                | 3.60684500              | -3.76265700 | 1.29442100  |
| H                | 3.69448800              | -4.40250400 | 2.16218500  |
| C                | 3.65586000              | -2.38115100 | 1.45997100  |
| C                | 3.85935300              | -1.82140100 | 2.85863100  |
| H                | 3.91603100              | -0.73706900 | 2.77800800  |
| C                | 2.67965700              | -2.16172400 | 3.77776700  |
| H                | 2.59049600              | -3.24049100 | 3.91719900  |
| H                | 1.74176500              | -1.79355300 | 3.36466100  |
| H                | 2.81672900              | -1.70669500 | 4.76011000  |
| C                | 5.17745600              | -2.30147900 | 3.48169800  |
| H                | 5.31892000              | -1.84496200 | 4.46266600  |
| H                | 6.03586900              | -2.03861000 | 2.86378800  |
| H                | 5.18331600              | -3.38397900 | 3.61481100  |
| C                | 3.25761800              | -1.29538400 | -2.22119400 |
| H                | 3.32870800              | -0.24800200 | -1.94669600 |
| C                | 4.39076400              | -1.59742100 | -3.21037300 |
| H                | 5.36808300              | -1.48946100 | -2.74469900 |
| H                | 4.34102600              | -0.91512000 | -4.06049600 |
| H                | 4.31150800              | -2.61438300 | -3.59764300 |
| C                | 1.89038200              | -1.48821000 | -2.88354700 |
| H                | 1.79164100              | -0.83452000 | -3.75171200 |
| H                | 1.09218800              | -1.25190300 | -2.18496300 |
| H                | 1.75936400              | -2.51618600 | -3.22327500 |
| C                | 4.36280300              | 0.73669200  | -0.03982700 |
| C                | 5.68587100              | 0.28336100  | -0.56199000 |
| C                | 6.39724100              | -0.77509600 | 0.00194600  |
| H                | 5.99405300              | -1.30679100 | 0.84622300  |
| C                | 7.62852800              | -1.15273400 | -0.51673200 |
| H                | 8.16911600              | -1.97325300 | -0.06461400 |

---

---

|   |             |             |             |
|---|-------------|-------------|-------------|
| C | 8.16064100  | -0.48490500 | -1.61265400 |
| H | 9.11442200  | -0.78792800 | -2.02321200 |
| C | 7.46228200  | 0.57834500  | -2.17575800 |
| H | 7.87104800  | 1.10603300  | -3.02694700 |
| C | 6.24043800  | 0.96489700  | -1.64783500 |
| H | 5.69409300  | 1.79513100  | -2.06873800 |
| C | 2.94850600  | 3.78656400  | 1.74357900  |
| C | 3.89696900  | 3.05477800  | 2.70854800  |
| H | 4.85357600  | 2.84064900  | 2.23649500  |
| H | 3.47132800  | 2.11725900  | 3.06841500  |
| H | 4.07055400  | 3.69076600  | 3.57881000  |
| C | 1.61780000  | 4.06556500  | 2.45750500  |
| H | 1.13604400  | 3.14597800  | 2.78884900  |
| H | 0.91299000  | 4.59913400  | 1.82468900  |
| H | 1.80929500  | 4.68081300  | 3.33938800  |
| C | 3.60890800  | 5.09672200  | 1.30792200  |
| H | 3.89787300  | 5.66113400  | 2.19765700  |
| H | 2.92954500  | 5.72133100  | 0.73188400  |
| H | 4.50605600  | 4.91588000  | 0.71760900  |
| C | 1.92918100  | 3.41268100  | -1.20148500 |
| C | 2.94745800  | 4.35785000  | -1.85482000 |
| H | 2.58225200  | 4.62209200  | -2.85001300 |
| H | 3.91853800  | 3.87751600  | -1.96324500 |
| H | 3.07843900  | 5.28023800  | -1.29670000 |
| C | 0.62173600  | 4.14669600  | -0.88758000 |
| H | 0.79557800  | 5.04134200  | -0.29090900 |
| H | -0.09084000 | 3.50817800  | -0.36847500 |
| H | 0.16474100  | 4.46644100  | -1.82667100 |
| C | 1.65851300  | 2.25983200  | -2.18279100 |
| H | 0.97660700  | 1.51932900  | -1.78021600 |
| H | 2.58339600  | 1.75646300  | -2.45923600 |
| H | 1.21520800  | 2.67136100  | -3.09106300 |
| C | -0.50531000 | 0.44088700  | -0.03571400 |
| O | 0.66487700  | -0.16891300 | -0.00597600 |
| O | -0.69714500 | 1.47126700  | 0.59914600  |
| C | -3.81412400 | 1.50324200  | -0.26580100 |
| C | -3.95314700 | 2.35070900  | -1.38449700 |
| C | -4.10786100 | 3.71894700  | -1.17805400 |
| H | -4.21005300 | 4.37394000  | -2.03300300 |
| C | -4.14820300 | 4.25380200  | 0.09765700  |
| H | -4.27062300 | 5.31919900  | 0.24066900  |
| C | -4.03914300 | 3.40942500  | 1.18921600  |
| H | -4.07820800 | 3.82614700  | 2.18635300  |

---

|   |             |             |             |
|---|-------------|-------------|-------------|
| C | -3.86517300 | 2.03663500  | 1.03974000  |
| C | -3.75901900 | 1.19513800  | 2.29934600  |
| H | -3.60310400 | 0.16140900  | 2.00571200  |
| C | -2.56522700 | 1.59790500  | 3.17510000  |
| H | -1.63623900 | 1.55331000  | 2.61492000  |
| H | -2.49425100 | 0.92957800  | 4.03573400  |
| H | -2.68521600 | 2.61341200  | 3.55673300  |
| C | -5.05774500 | 1.26262400  | 3.11760300  |
| H | -5.01625300 | 0.55982800  | 3.95173200  |
| H | -5.93115600 | 1.02431800  | 2.51555800  |
| H | -5.19822400 | 2.26194700  | 3.53286600  |
| C | -3.97925400 | 1.83268400  | -2.81359400 |
| H | -3.87898800 | 0.74948900  | -2.78176900 |
| C | -5.31274300 | 2.14368500  | -3.50788000 |
| H | -6.15821700 | 1.72686400  | -2.96041600 |
| H | -5.32277700 | 1.71913600  | -4.51315800 |
| H | -5.47386700 | 3.21866800  | -3.59835600 |
| C | -2.80714600 | 2.38466900  | -3.63461100 |
| H | -2.87612800 | 3.46907600  | -3.73599400 |
| H | -2.80410700 | 1.95183100  | -4.63639200 |
| H | -1.85331700 | 2.14912100  | -3.16367700 |
| C | -4.28101400 | -0.90146500 | -0.01710400 |
| C | -5.69719600 | -0.69883900 | 0.40496400  |
| C | -6.22143500 | -1.52052900 | 1.40521200  |
| H | -5.58003700 | -2.26790700 | 1.84662000  |
| C | -7.53430100 | -1.37372700 | 1.82440400  |
| H | -7.92128500 | -2.00663400 | 2.61167300  |
| C | -8.35168900 | -0.41481700 | 1.23507900  |
| H | -9.37646700 | -0.29834400 | 1.56140300  |
| C | -7.84577800 | 0.38993200  | 0.22170400  |
| H | -8.47659200 | 1.13085800  | -0.25027700 |
| C | -6.52629600 | 0.25246400  | -0.18790900 |
| H | -6.14441400 | 0.88806100  | -0.96811800 |
| C | -1.43602900 | -3.09044500 | 1.20514900  |
| C | -2.22007800 | -4.24600500 | 1.84335400  |
| H | -1.84353800 | -4.40041800 | 2.85705900  |
| H | -2.10204900 | -5.18022600 | 1.30461200  |
| H | -3.28183200 | -4.01290500 | 1.90878500  |
| C | -1.46138000 | -1.91671000 | 2.19614600  |
| H | -2.48273700 | -1.63034100 | 2.43869700  |
| H | -0.93908100 | -1.04203300 | 1.82547600  |
| H | -0.97121800 | -2.23158800 | 3.11917500  |
| C | 0.01119000  | -3.49518700 | 0.91415300  |



---

|    |             |             |             |
|----|-------------|-------------|-------------|
| H  | 0.51908300  | -3.71533300 | 1.85421000  |
| H  | 0.56689000  | -2.69962400 | 0.42091600  |
| H  | 0.06855900  | -4.39110400 | 0.29884200  |
| C  | -2.35645400 | -3.73262300 | -1.72752700 |
| C  | -1.00896800 | -3.77537900 | -2.45868900 |
| H  | -0.19278600 | -4.09519900 | -1.81432700 |
| H  | -0.75184100 | -2.80071600 | -2.87006800 |
| H  | -1.07553900 | -4.48098900 | -3.28987300 |
| C  | -2.74538200 | -5.13211200 | -1.24403100 |
| H  | -2.95151500 | -5.75957400 | -2.11415200 |
| H  | -3.64179700 | -5.11008800 | -0.62613700 |
| H  | -1.94263900 | -5.60680100 | -0.68403000 |
| C  | -3.43793400 | -3.23276700 | -2.69960900 |
| H  | -3.47461900 | -3.90821300 | -3.55679800 |
| H  | -3.21633800 | -2.23271500 | -3.07245900 |
| H  | -4.41667700 | -3.21473300 | -2.22505900 |
| Ge | 1.79427800  | 0.56008500  | 1.41200600  |
| Ge | -1.78161500 | -0.35154100 | -1.42318500 |
| N  | 3.48356100  | -0.14041600 | 0.49289600  |
| N  | 4.13220700  | 2.02861700  | -0.14188200 |
| N  | -3.53060700 | 0.11845600  | -0.47684800 |
| N  | -3.84184300 | -2.14226400 | 0.07591200  |
| P  | 2.63883100  | 2.59850500  | 0.33204400  |
| P  | -2.26901500 | -2.45816300 | -0.35391800 |

---

## S8. Reference

1. T. Ogawa, A. J. Ruddy, O. L. Sydora, M. Stradiotto and L. Turculet, *Organometallics.*, 2017, **36**, 417-423.
2. R. K. Harris, E. D. Becker, S. M. Cabral de Menezes, R. Goodfellow and P. Granger, *International Union of Pure and Applied Chemistry* 2002, **1**, 43–64.
3. R. K. Harris, E. D. Becker, S. M. Cabral de Menezes, P. Granger, R. E. Hoffman and K. W. Zilm, *Pure Appl. Chem.*, 2008, **80**, 59–84.
4. G. M. Sheldrick, SADABS V2014/4 (Bruker AXS Inc.), University of Göttingen, Germany, 2014.
5. G. M. Sheldrick, SHELXL-2014/6 (Sheldrick, 2014); Bruker AXS Inc., Madison, WI, USA, 2014.
6. Gaussian 09, Revision A.02, M. J. Frisch, G. W. Trucks, H. B. Schlegel, G. E. Scuseria, M. A. Robb, J. R. Cheeseman, G. Scalmani, V. Barone, G. A. Petersson, H. Nakatsuji, X. Li, M. Caricato, A. Marenich, J. Bloino, B. G. Janesko, R. Gomperts, B. Mennucci, H. P. Hratchian, J. V. Ortiz, A. F. Izmaylov, J. L. Sonnenberg, D. Williams-Young, F. Ding, F. Lipparini, F. Egidi, J. Goings, B. Peng, A. Petrone, T. Henderson, D. Ranasinghe, V. G. Zakrzewski, J. Gao, N. Rega, G. Zheng, W. Liang, M. Hada, M. Ehara, K. Toyota, R. Fukuda, J. Hasegawa, M. Ishida, T. Nakajima, Y. Honda, O. Kitao, H. Nakai, T. Vreven, K. Throssell, J. A. Montgomery, Jr., J. E. Peralta, F. Ogliaro, M. Bearpark, J. J. Heyd, E. Brothers, K. N. Kudin, V. N. Staroverov, T. Keith, R. Kobayashi, J. Normand, K. Raghavachari, A. Rendell, J. C. Burant, S. S. Iyengar, J. Tomasi, M. Cossi, J. M. Millam, M. Klene, C. Adamo, R. Cammi, J. W. Ochterski, R. L. Martin, K. Morokuma, O. Farkas, J. B. Foresman, and D. J. Fox, Gaussian, Inc., Wallingford CT, 2016.
